# Supplementary material for: Exceptional effect of nitro substituent on the phosphonation of imines: the first report on phosphonation of imines to α-iminophosphonates and α-(N-phosphorylamino)phosphonates
Source: Royal Society of Chemistry journal article supplement (doi:10.1039/c5ra14393d), 2015-01-01
Supplement: c5ra14393d1.pdf [file c5ra14393d1.pdf]

## Supporting information

### Exceptional Effect of Nitro Substituent on the Phosphonation of Imines: The First Report on Phosphonation of Imines to $\alpha$ -Iminophosphonates and $\alpha$ -(N-phosphorylamino)phosphonates

Somayeh Motevalli\*, Nasser Iranpoor\* Elham Etemadi-Davan, and Khashayar Rajabi Moghadam

E-mail: [somayeh.motevalli@gmail.com](mailto:somayeh.motevalli@gmail.com); [iranpoor@susc.ac.ir](mailto:iranpoor@susc.ac.ir)

Chemistry Department, College of Sciences, Shiraz University, Shiraz 71454, Iran

#### Spectral data:

#### (2a):

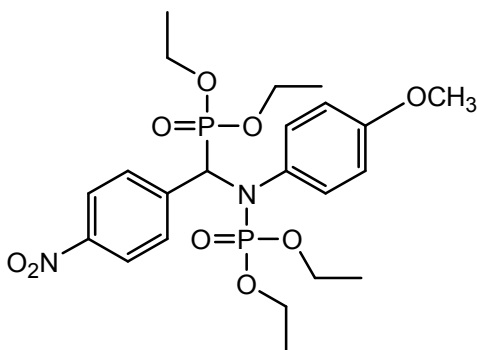

Yellow oil;  $^1\text{H-NMR}$  ( $\text{CDCl}_3$ , 250 MHz)  $\delta$  (ppm): 8.06 (d, 2H,  $J=9\text{Hz}$ ), 7.49 (d, 2H,  $J=9\text{Hz}$ ), 6.82 (d, 2H,  $J=9\text{Hz}$ ), 6.66 (d, 2H,  $J=9\text{Hz}$ ), 5.63 (dd, 1H,  $^2J(\text{H-P})=23.1\text{Hz}$ ,  $^3J(\text{H-P})=11\text{Hz}$ ), 4.23-3.78 (m, 8H), 3.70 (d, 3H,  $J=1\text{Hz}$ ), 1.30 (t, 3H,  $J=7\text{Hz}$ ), 1.20 (mt, 3H, ), 1.10 (mt, 3H), 1.02 (t, 3H,  $J=7\text{Hz}$ );  $^{13}\text{C-NMR}$  ( $\text{CDCl}_3$ , 62.9 MHz)  $\delta$  (ppm): 159.0, 147.7, 142.1 (d,  $^2J(\text{C-P})=6.0\text{Hz}$ ), 132.9, 131.9 (d,  $^2J(\text{C-P})=8.4\text{Hz}$ ), 129.4, 123.2, 113.4, 62.6-63.0 (m, 4C,  $-\text{CH}_2-$ ), 58.5 (dd,  $-\text{CH}-$ ,  $^2J(\text{C-P})=8.3\text{Hz}$ ,  $^1J(\text{C-P})=162.1\text{Hz}$ ), 55.2 (1C,  $-\text{OCH}_3$ ), 15.9-16.4 (m, 4C,  $-\text{CH}_3$ );  $^{31}\text{P-NMR}$  ( $\text{CDCl}_3$ , 162 MHz)  $\delta$  (ppm): 19.94 (d,  $^3J(\text{P-P})=21.8\text{Hz}$ ), 5.71 (d,  $^3J(\text{P-P})=21.8\text{Hz}$ ); IR (KBr):  $\nu$  [ $\text{cm}^{-1}$ ] 2985.6, 2931.6, 2869.9, 1604.7, 1519.8, 1350.1, 1249.8, 1026.1, 964.3, 864.1; Anal. Calcd for  $\text{C}_{22}\text{H}_{32}\text{N}_2\text{O}_9\text{P}_2$ : C, 49.81; H, 6.08; N, 5.28. Found: C, 49.42; H, 5.83; N, 4.98.

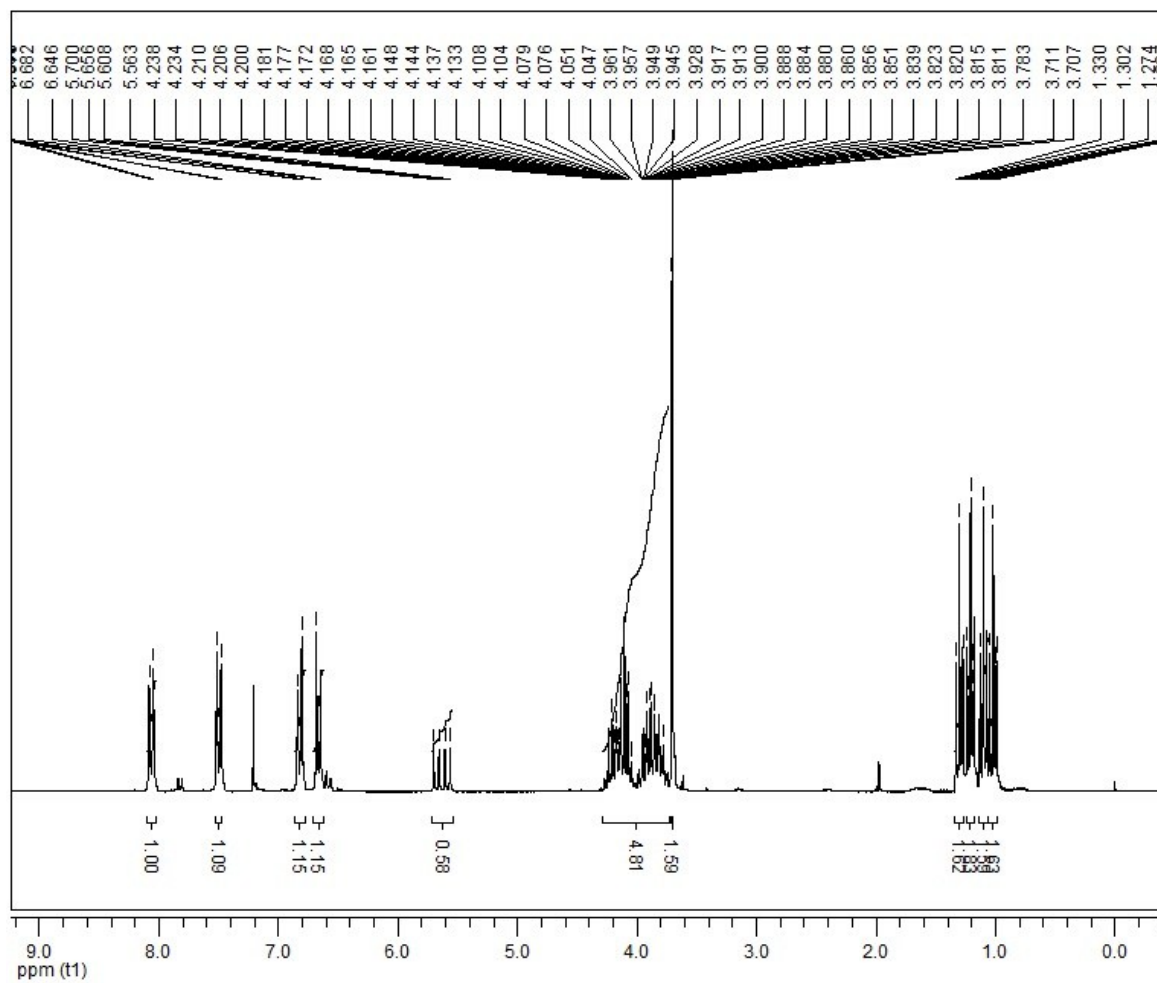

<sup>1</sup>H NMR

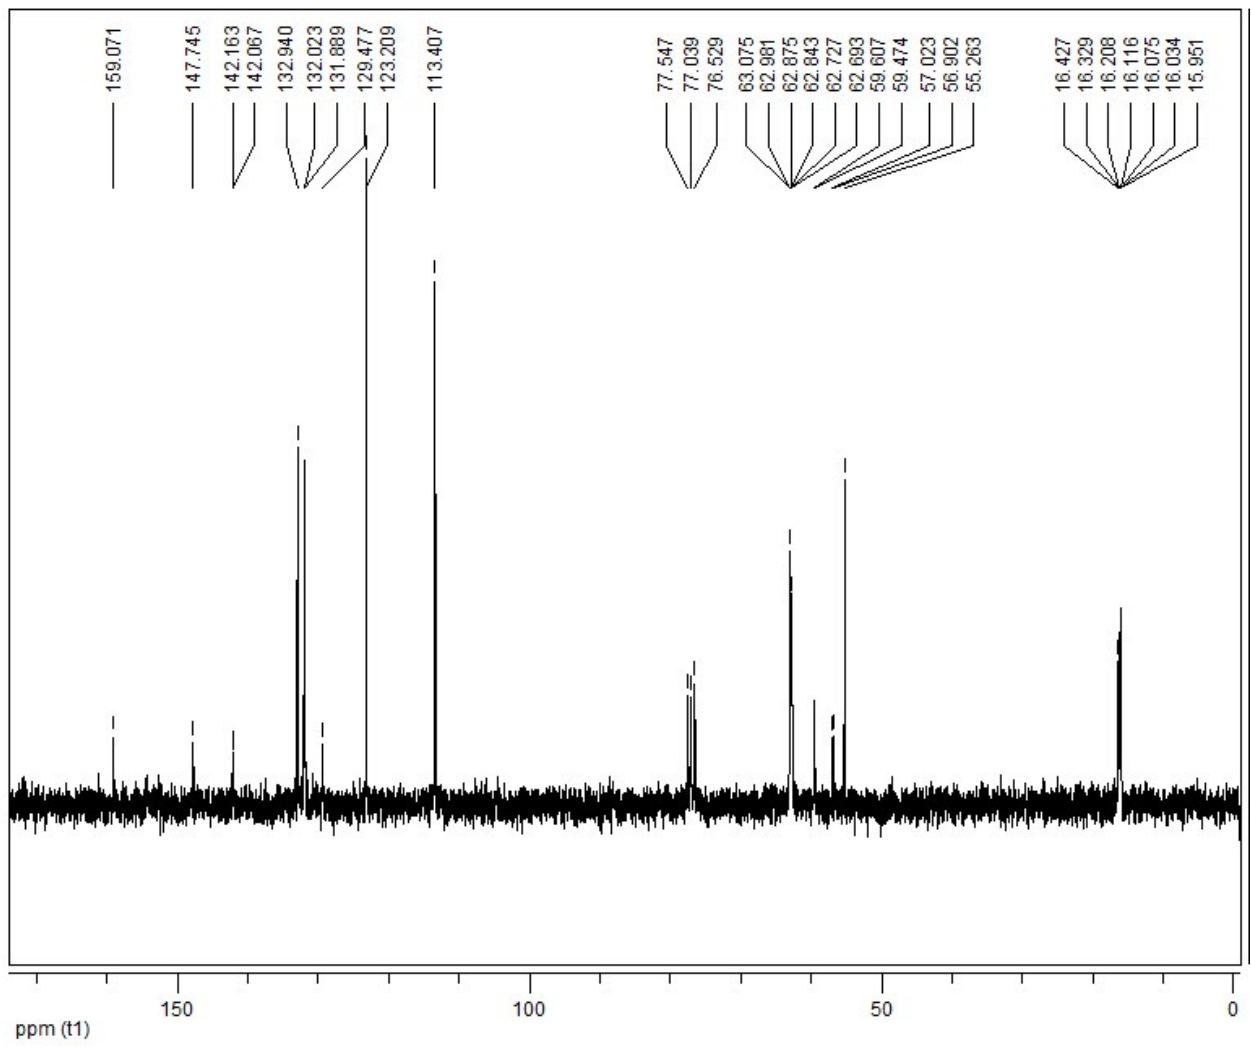

$^{13}\text{C}$  NMR

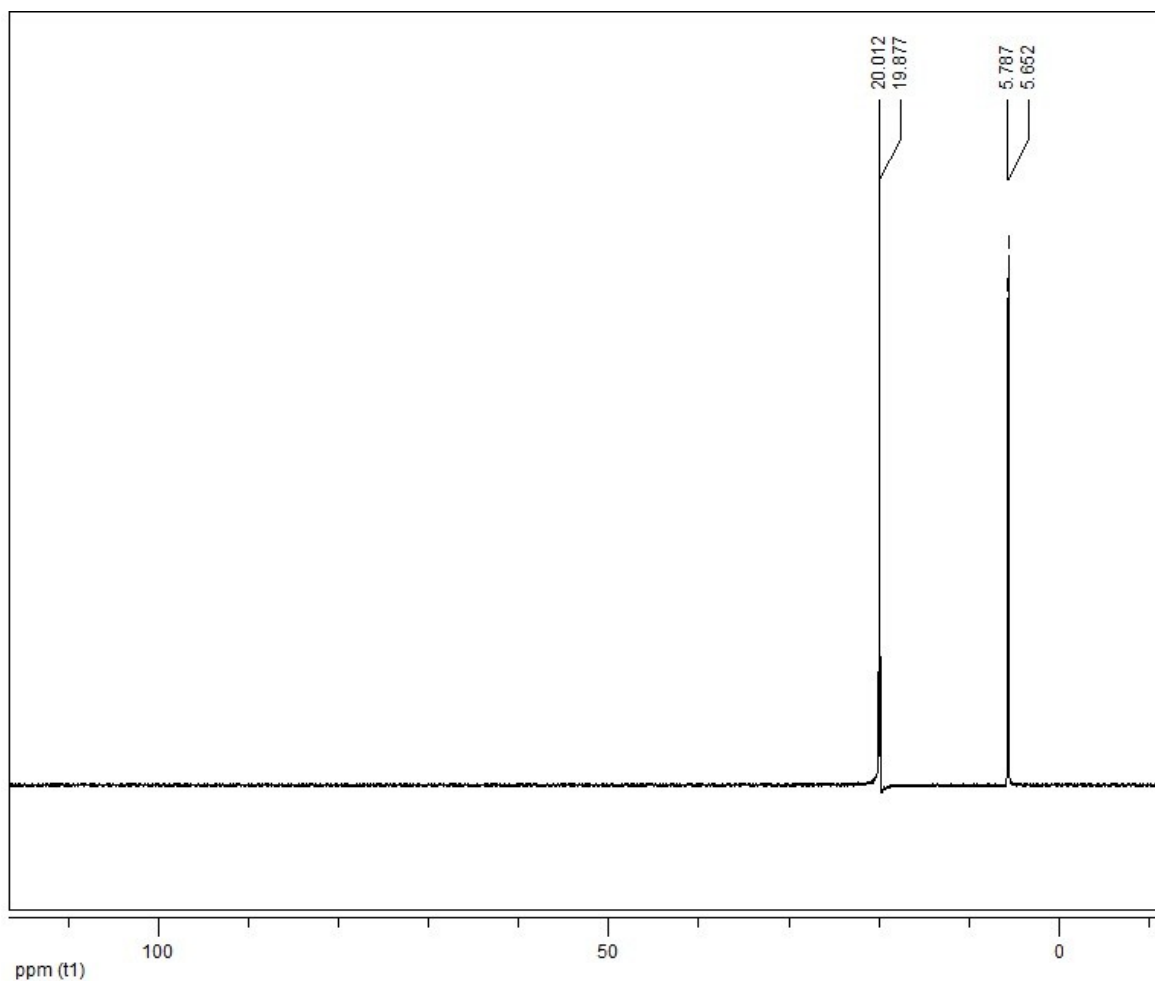

**$^{13}\text{P}$  NMR**

**(2b):**

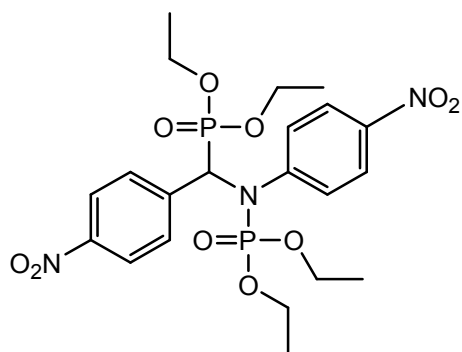

Pale yellow solid (mp: 87-88 °C);  $^1\text{H}$ -NMR ( $\text{CDCl}_3$ , 250 MHz)  $\delta$  (ppm): 8.16 (d, 2H,  $J=9\text{Hz}$ ), 8.08 (d, 2H,  $J=9\text{Hz}$ ), 7.63 (d, 2H,  $J=9\text{Hz}$ ), 7.21 (d, 2H,  $J=9\text{Hz}$ ), 5.83 (dd, 1H,  $^2\text{J}(\text{H-P})=24.6\text{Hz}$ ,  $^3\text{J}(\text{H-P})=11.8\text{Hz}$ ), 4.31-3.85 (m, 8H), 1.35 (t, 3H,  $J=7\text{Hz}$ ), 1.29 (mt, 3H), 1.20 (t, 3H), 1.12 (t, 3H,  $J=7\text{Hz}$ );  $^{13}\text{C}$ -NMR ( $\text{CDCl}_3$ , 62.9 MHz)  $\delta$  (ppm): 147.8, 146.2, 144.5, 141.5 (d,  $^3\text{J}(\text{C-P})=3.5\text{Hz}$ ), 131.1 (d,  $^2\text{J}(\text{C-P})=7.9\text{Hz}$ ), 130.4, 123.6 (d,  $^2\text{J}(\text{C-P})=7.9\text{Hz}$ ), 63.0-63.7 (m, 4C,  $-\text{CH}_2-$ ), 58.4 (dd, -

CH-,  $^2J$  (C-P)= 5.5Hz,  $^1J$  (C-P)= 161.0Hz), 15.9-16.4 (m, 4C, -CH<sub>3</sub>);  $^{31}\text{P-NMR}$  (CDCl<sub>3</sub>, 162 MHz)  $\delta$  (ppm): 19.28 (d,  $^3J$ (P-P)= 20.5 Hz), 4.51 (d,  $^3J$ (P-P)= 20.5 Hz); IR (KBr):  $\nu$  [cm<sup>-1</sup>]2977.9, 2916.2, 1595.9, 1519.8, 1350.1, 1249.8, 1026.1, 972.1; MS (70 eV, EI):  $m/z$  (%):545, M<sup>+</sup> (0.4), 408 (100.0); Anal. Calcd for C<sub>21</sub>H<sub>29</sub>N<sub>3</sub>O<sub>10</sub>P<sub>2</sub>: C, 46.24; H, 5.36; N, 7.70. Found: C, 46.25; H, 5.75; N, 8.00.

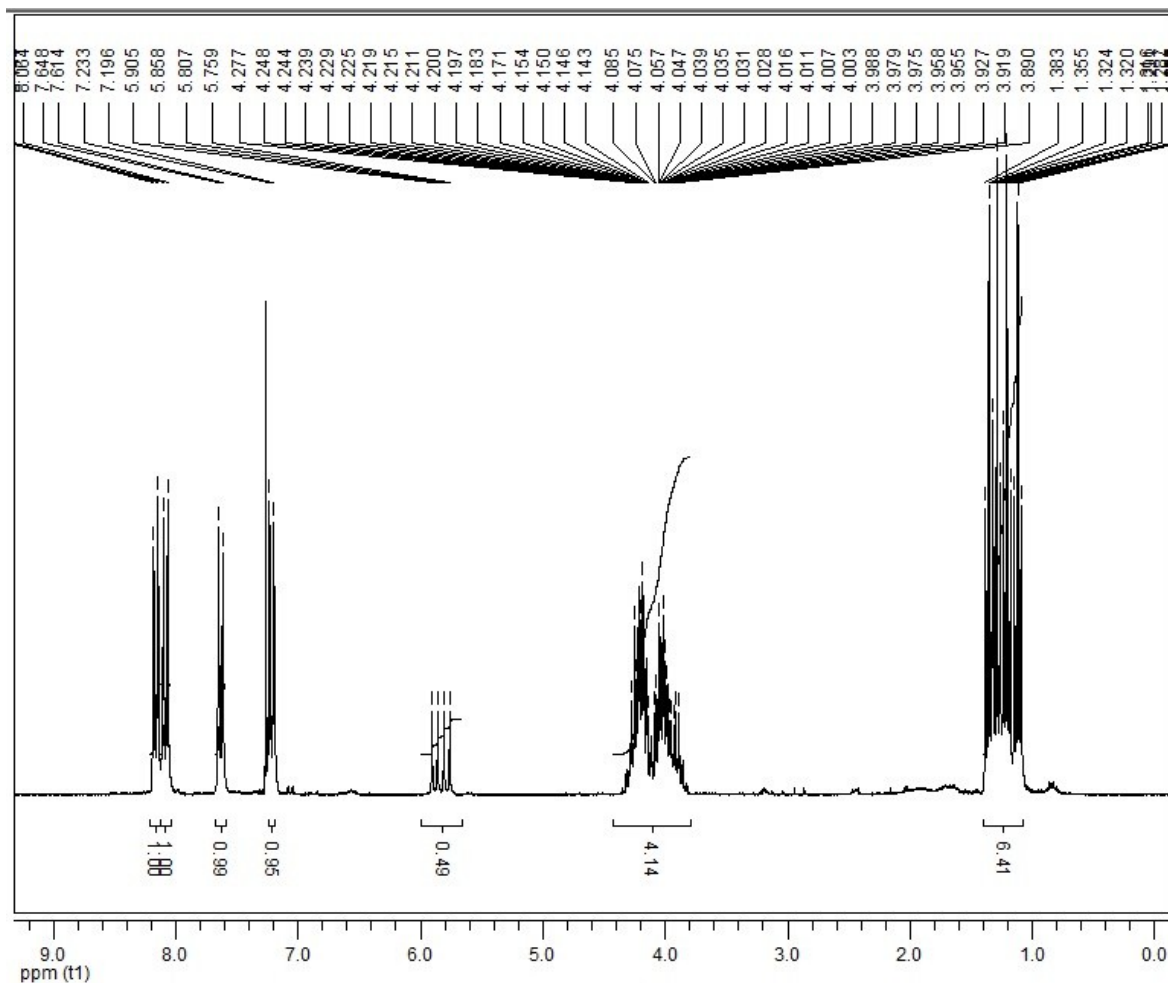

$^1\text{H NMR}$

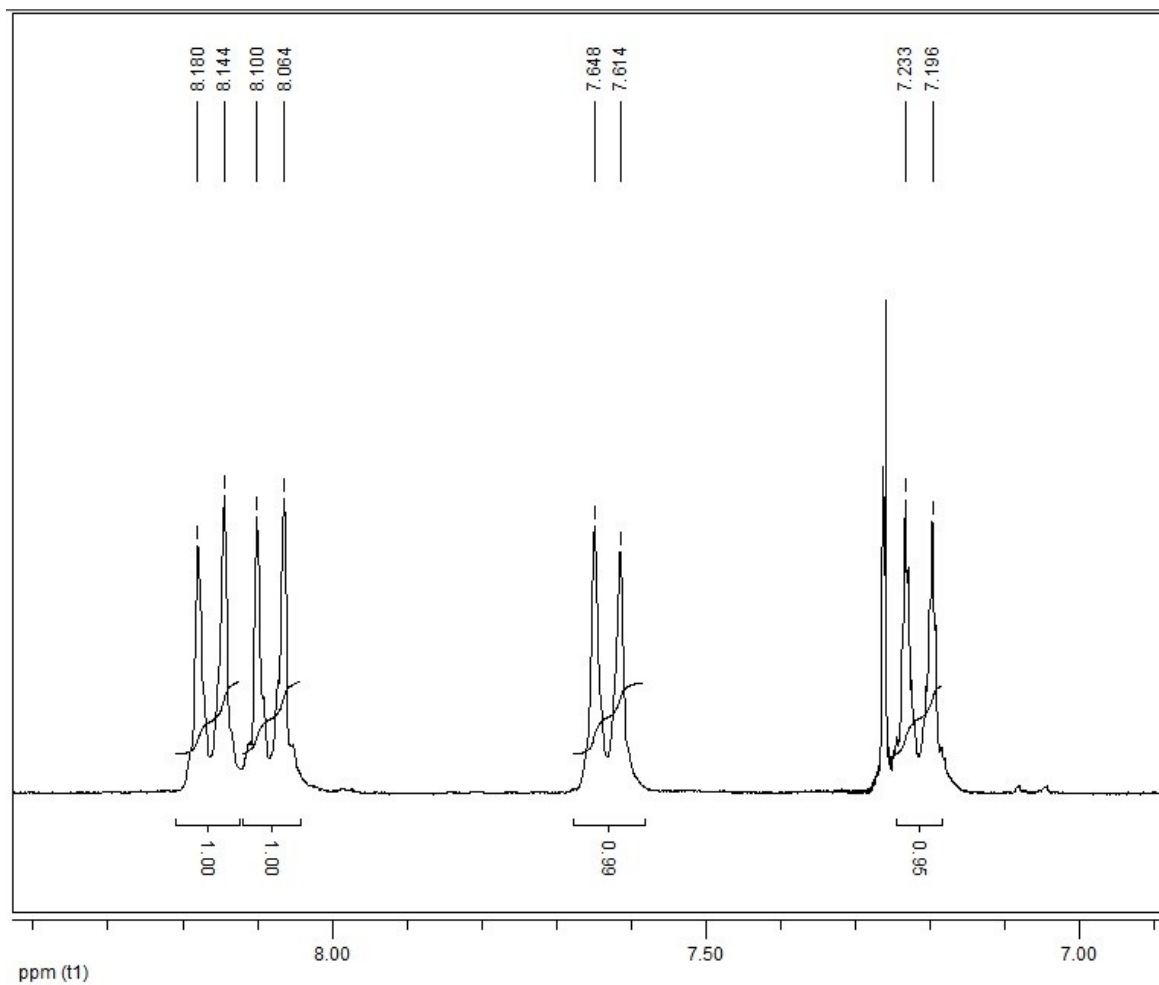

**Expanded  $^1\text{H}$  NMR of aromatic area**

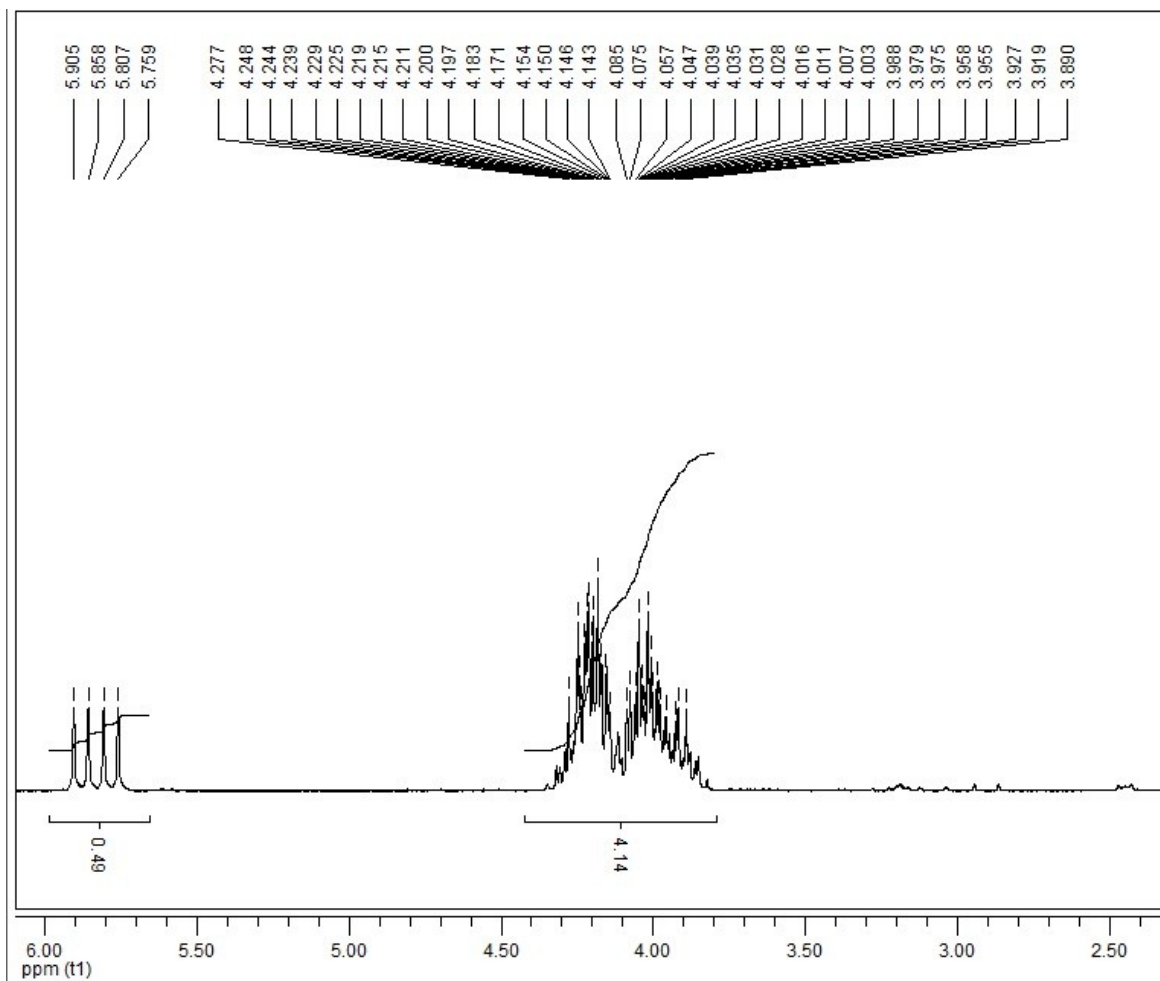

Expanded  $^1\text{H}$  NMR of  $-\text{CH}$ ,  $-\text{CH}_2$

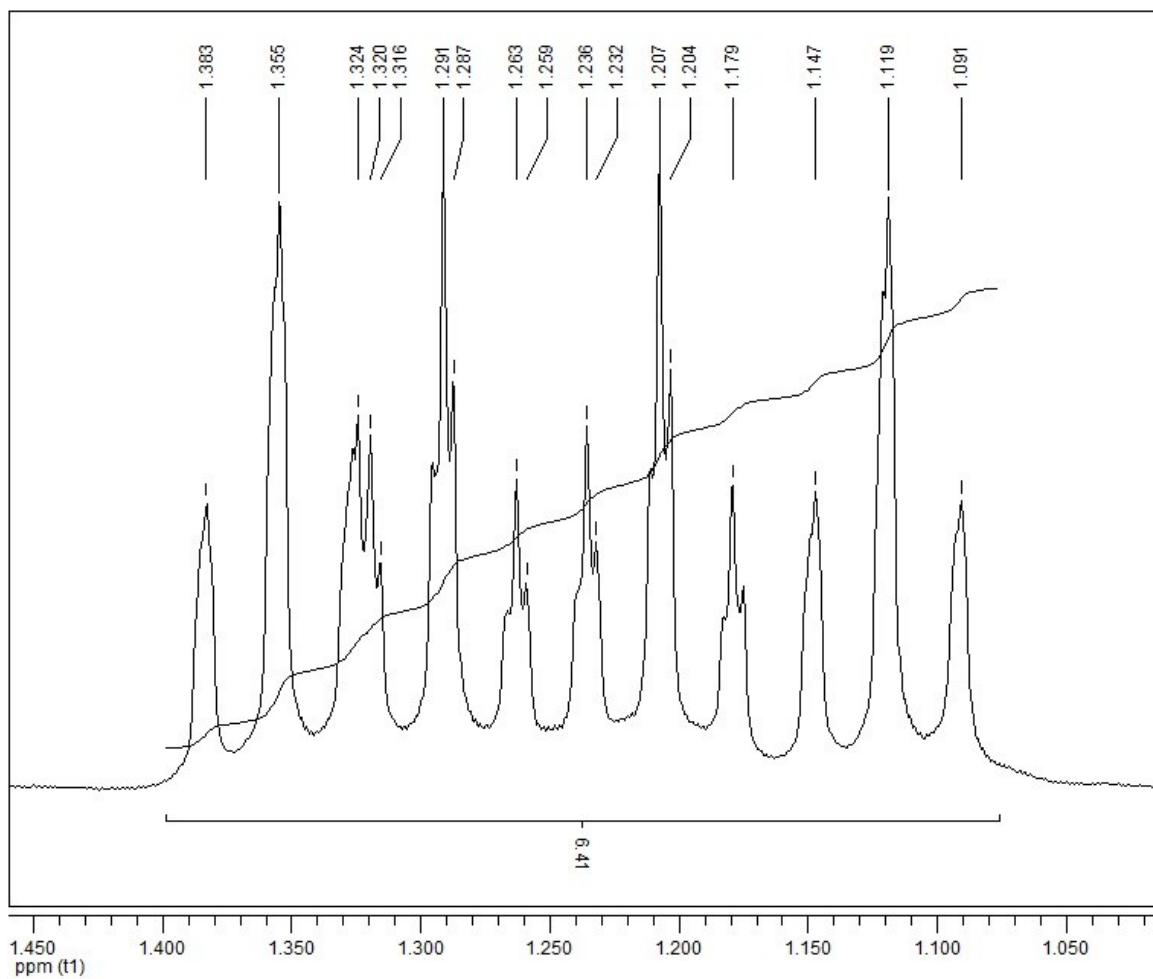

Expanded  $^1\text{H}$  NMR of  $-\text{CH}_3$



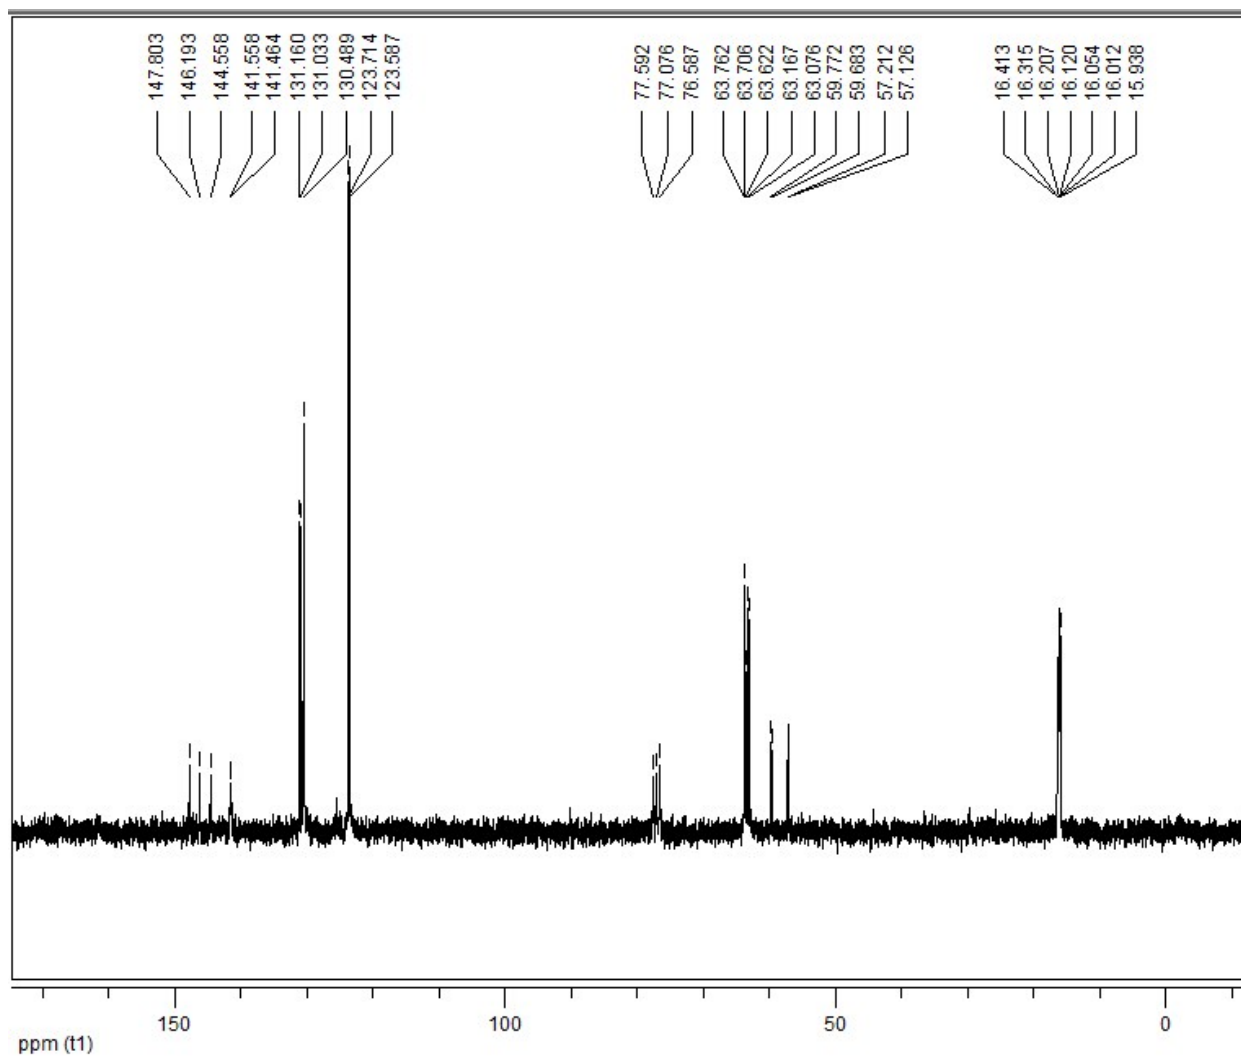

$^{13}\text{C}$  NMR

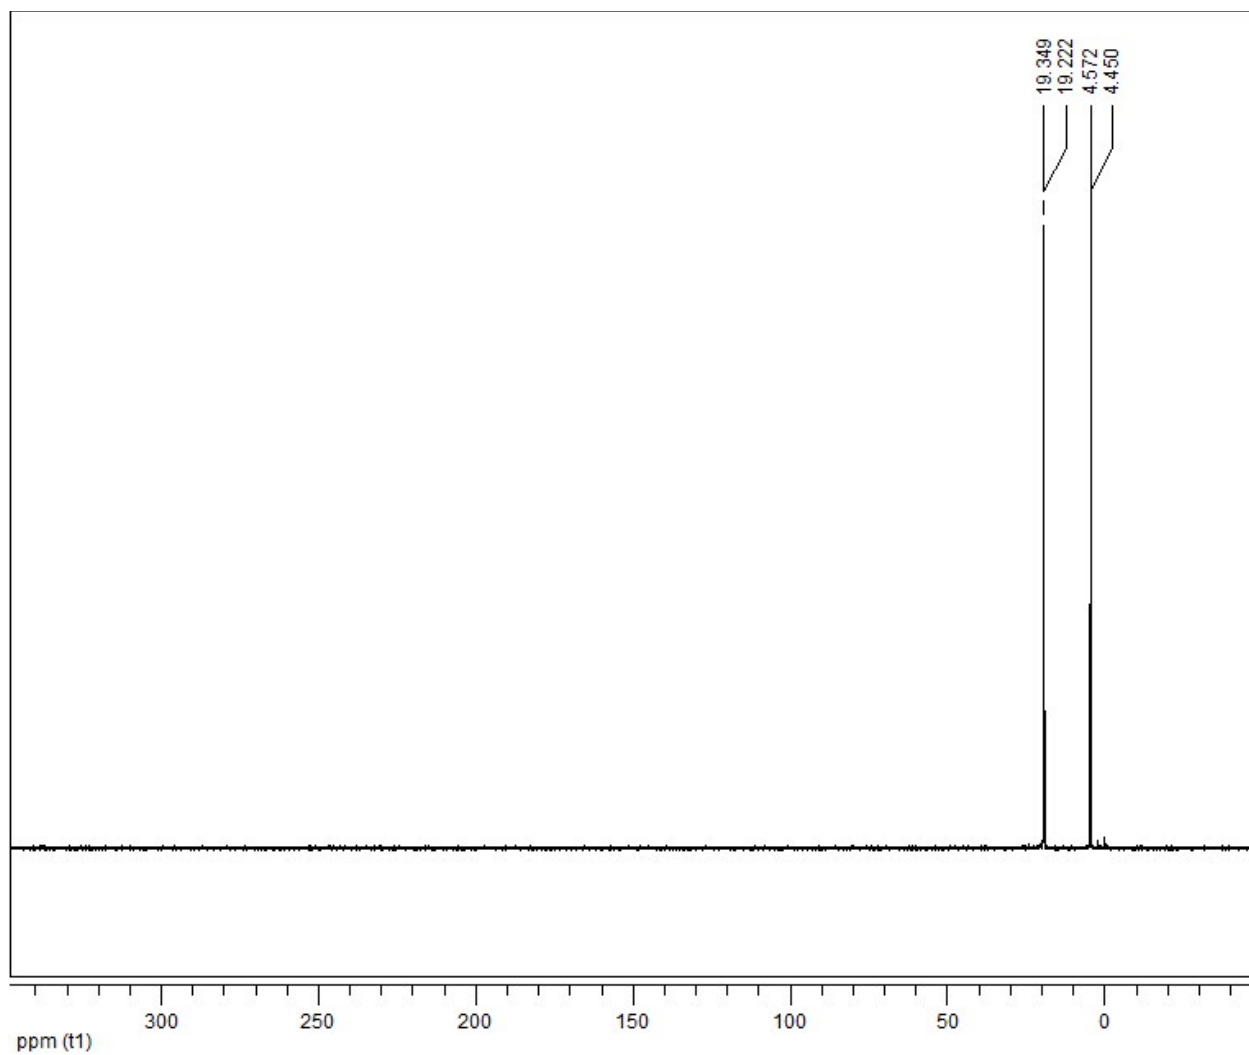

$^{31}\text{P}$  NMR

(2c):

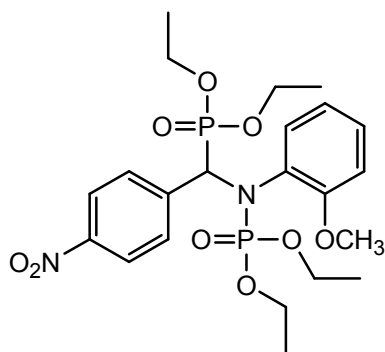

Pale yellow solid (mp: 115-115.5 °C);  $^1\text{H-NMR}$  ( $\text{CDCl}_3$ , 250 MHz)  $\delta$  (ppm): 8.12-8.09 (m, 2H), 7.91-7.88 (m, 2H), 6.76-6.60 (m, 2H), 6.49- 6.41 (m, 1H), 6.10 (d, 1H,  $J= 7.5\text{Hz}$ ), 5.68-5.64 (m, 1H), 4.21-3.96 (m, 11H), 1.23-1.09 (m, 12H);  $^{13}\text{C-NMR}$  ( $\text{CDCl}_3$ , 62.9 MHz)  $\delta$  (ppm): 158.2, 143.2, 136.3, 130.2 (d,  $^2J(\text{C-P})= 4.1\text{Hz}$ ), 129.6, 122.5, 119.6, 118.6, 116.6, 64.1-64.4 (m, 4C, - $\text{CH}_2$ -), 57.8 (broad s, 1C, - $\text{CH}$ -), 55.7 (1C, - $\text{OCH}_3$ ), 16.2 (broad s, 4C, - $\text{CH}_3$ );  $^{31}\text{P-NMR}$  ( $\text{CDCl}_3$ , 162 MHz) $\delta$  (ppm): 20.76, 17.51; IR (KBr):  $\nu$  [ $\text{cm}^{-1}$ ] 2985.6, 2931.6, 1596.9, 1519.8, 1458.1, 1342.4, 1249.8, 1164.9, 1118.6, 1026.1, 972.1, 856.3, 740.6; MS (70 eV, ED):  $m/z$  (%): 530,  $\text{M}^+$  (5.7), 255 (100.0); Anal. Calcd for  $\text{C}_{22}\text{H}_{33}\text{N}_2\text{O}_9\text{P}_2$ : C, 49.81; H, 6.08; N, 5.28. Found: C, 49.50; H, 5.78; N, 5.08.

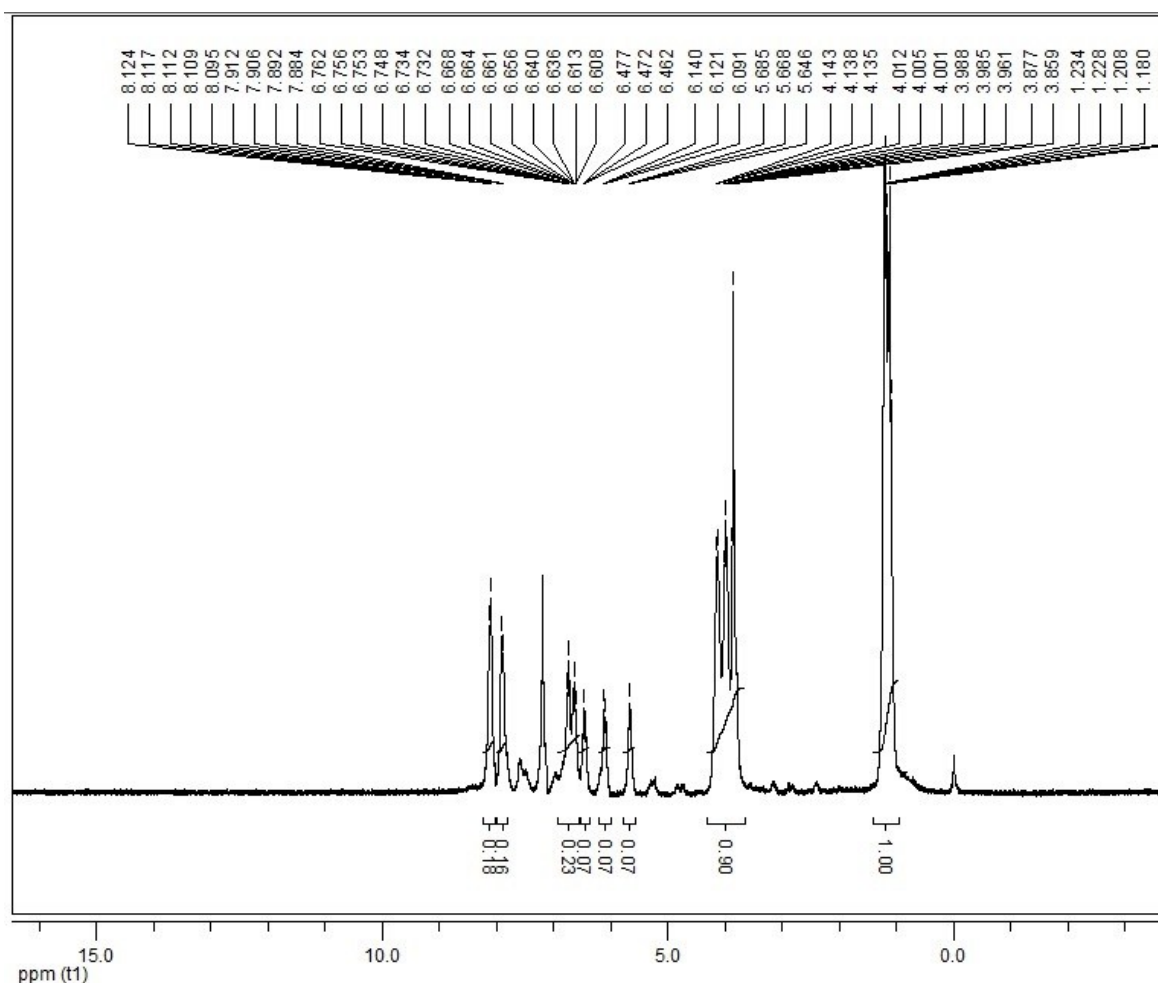

$^1\text{H NMR}$

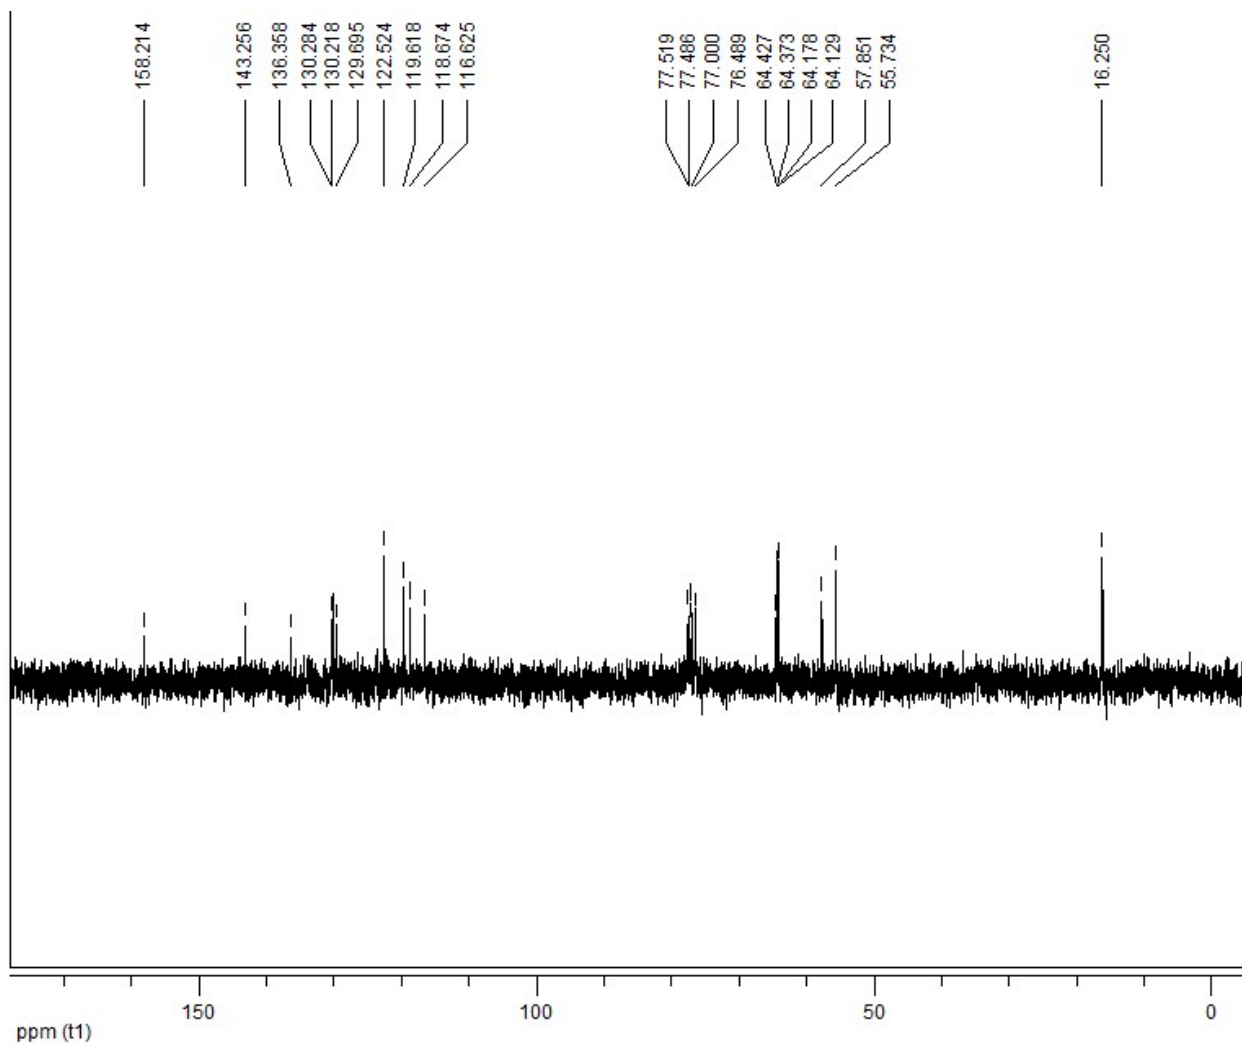

$^{13}\text{C}$  NMR

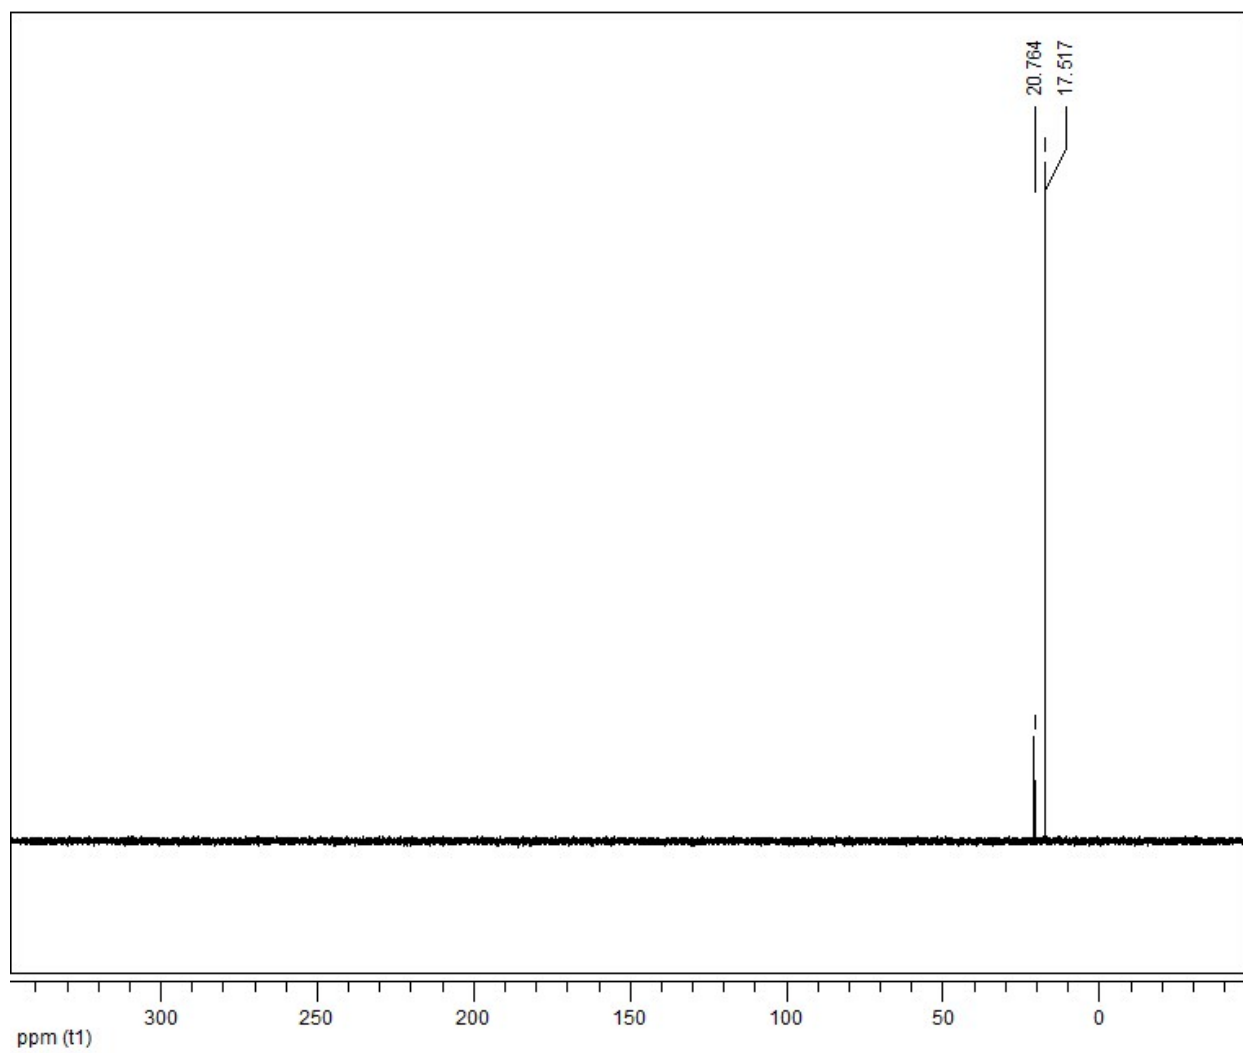

$^{31}\text{P}$  NMR

(2d):

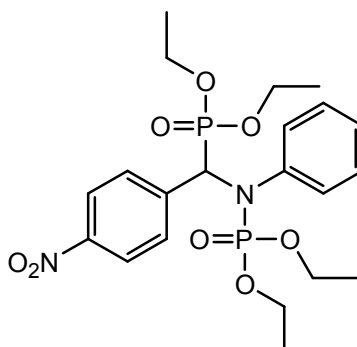

Yellow oil;  $^1\text{H-NMR}$  ( $\text{CDCl}_3$ , 250 MHz)  $\delta$  (ppm): 8.06 (d, 2H,  $J= 8.2\text{Hz}$ ), 7.51 (d, 2H,  $J= 8.7\text{Hz}$ ), 7.20-7.14 (m, 3H), 6.95-6.90 (m, 2H), 5.66 (dd, 1H,  $^2J(\text{H-P})= 23.5\text{Hz}$ ,  $^3J(\text{H-P})= 11.5\text{Hz}$ ), 4.25-3.74 (m, 8H), 1.28 (t, 3H,  $J= 7\text{Hz}$ ), 1.21 (mt, 3H), 1.09 (mt, 3H), 1.02 (t, 3H,  $J= 7\text{Hz}$ );  $^{13}\text{C-NMR}$  ( $\text{CDCl}_3$ , 62.9 MHz)  $\delta$  (ppm): 147.9, 131.8 (d,  $^2J(\text{C-P})= 8.4\text{Hz}$ , two peaks), 131.6, 128.3, 128.0, 123.2, 123.0, 62.6-63.1 (m, 4C,  $-\text{CH}_2-$ ), 59.6-59.7 (m, 1C,  $-\text{CH}-$ ), 54.3 (broad s, 1C,  $-\text{CH}-$ ), 15.9-16.4 (m, 4C,  $-\text{CH}_3$ );  $^{31}\text{P-NMR}$  ( $\text{CDCl}_3$ , 162 MHz)  $\delta$  (ppm): 19.60, 3.08; IR (KBr):  $\nu$  [ $\text{cm}^{-1}$ ] 2985.6, 2931.6, 1596.9, 1527.5, 1490.1, 1442.7, 1350.1, 1257.5, 1164.9, 1026.1, 972.1, 864.1, 794.6; MS (70 eV, EI):  $m/z$  (%): 500,  $\text{M}^+$  (1.0), 363 (100.0); Anal. Calcd for  $\text{C}_{21}\text{H}_{31}\text{N}_2\text{O}_8\text{P}_2$ : C, 50.40; H, 6.04; N, 5.60. Found: C, 50.12; H, 5.72; N, 5.30.

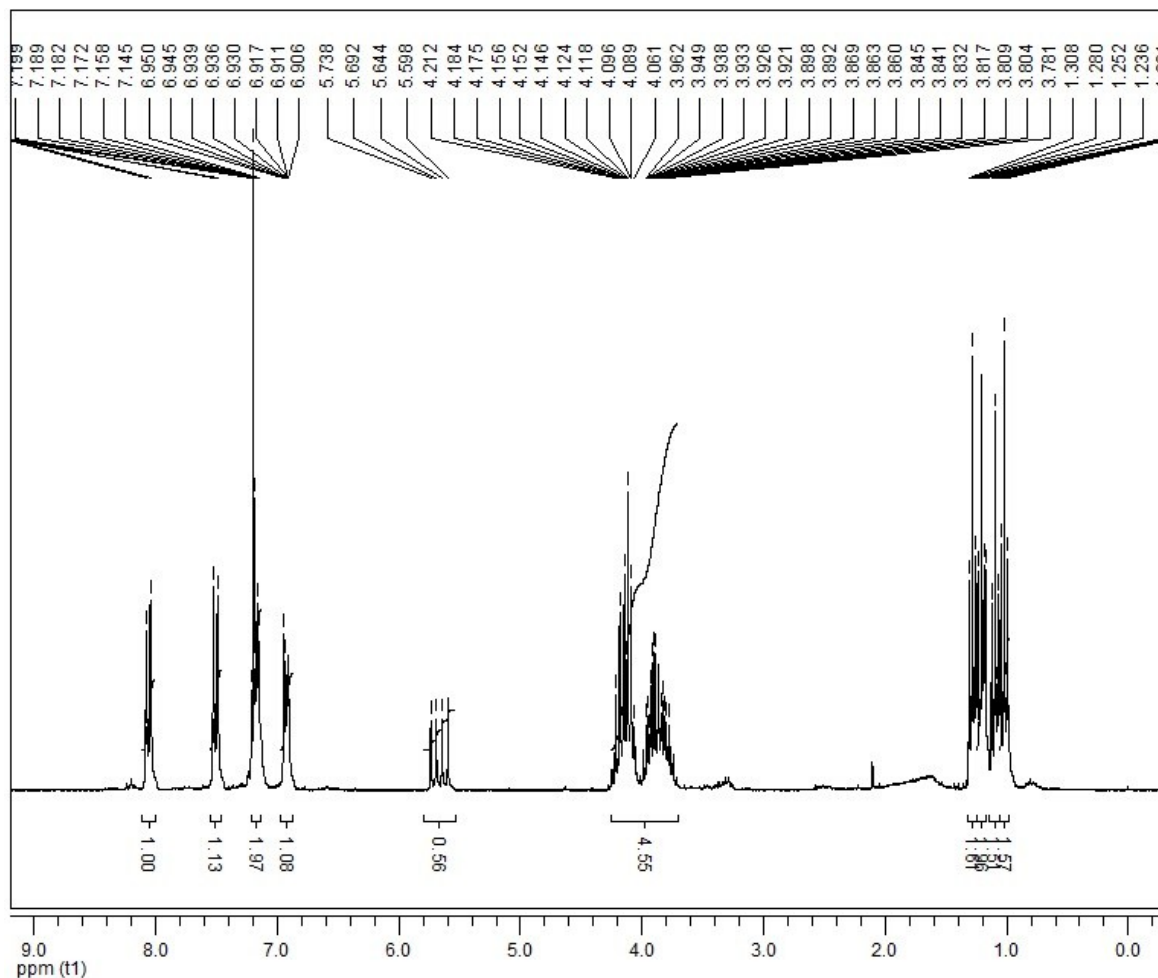

$^1\text{H NMR}$

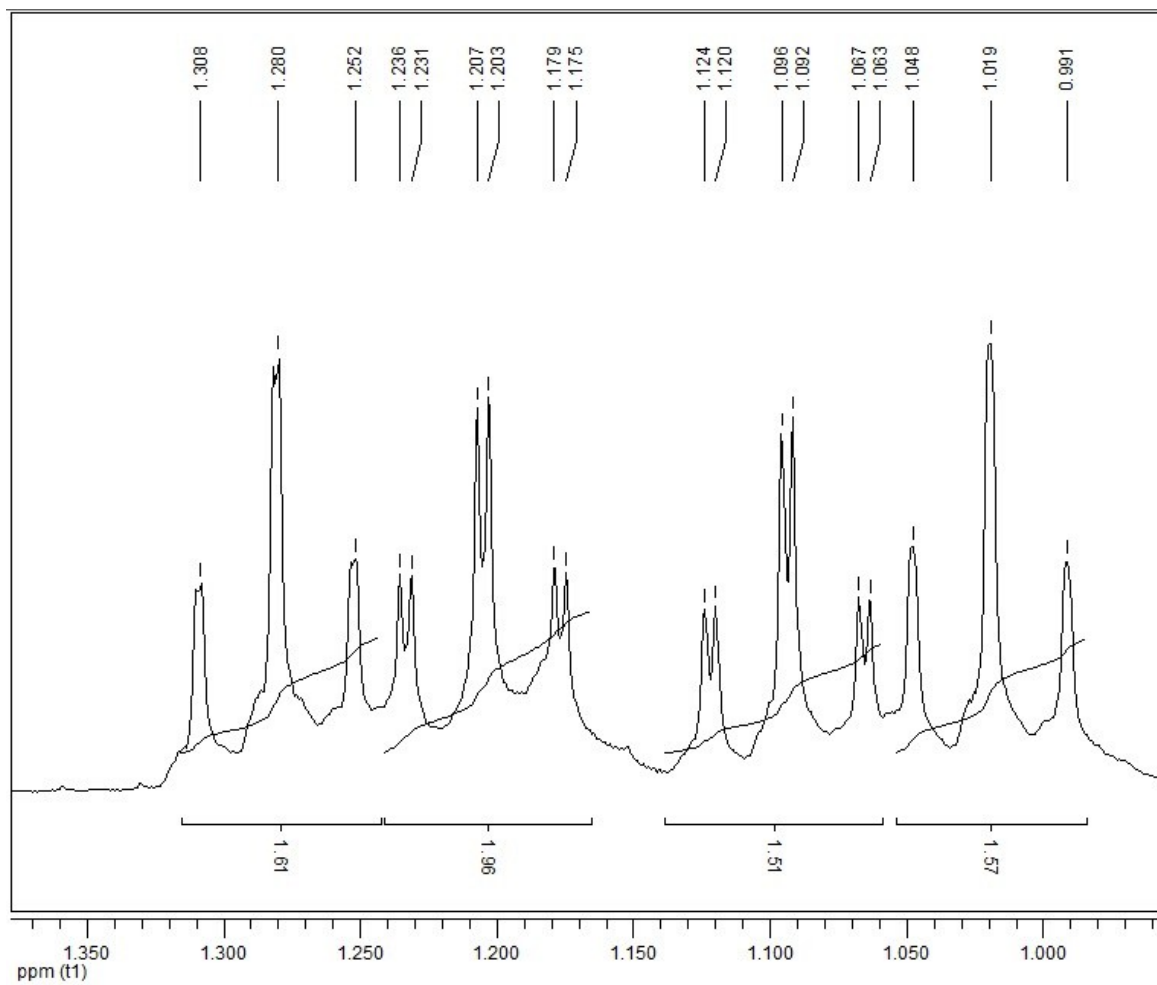

**Expanded  $^1\text{H}$  NMR of  $-\text{CH}_3$**

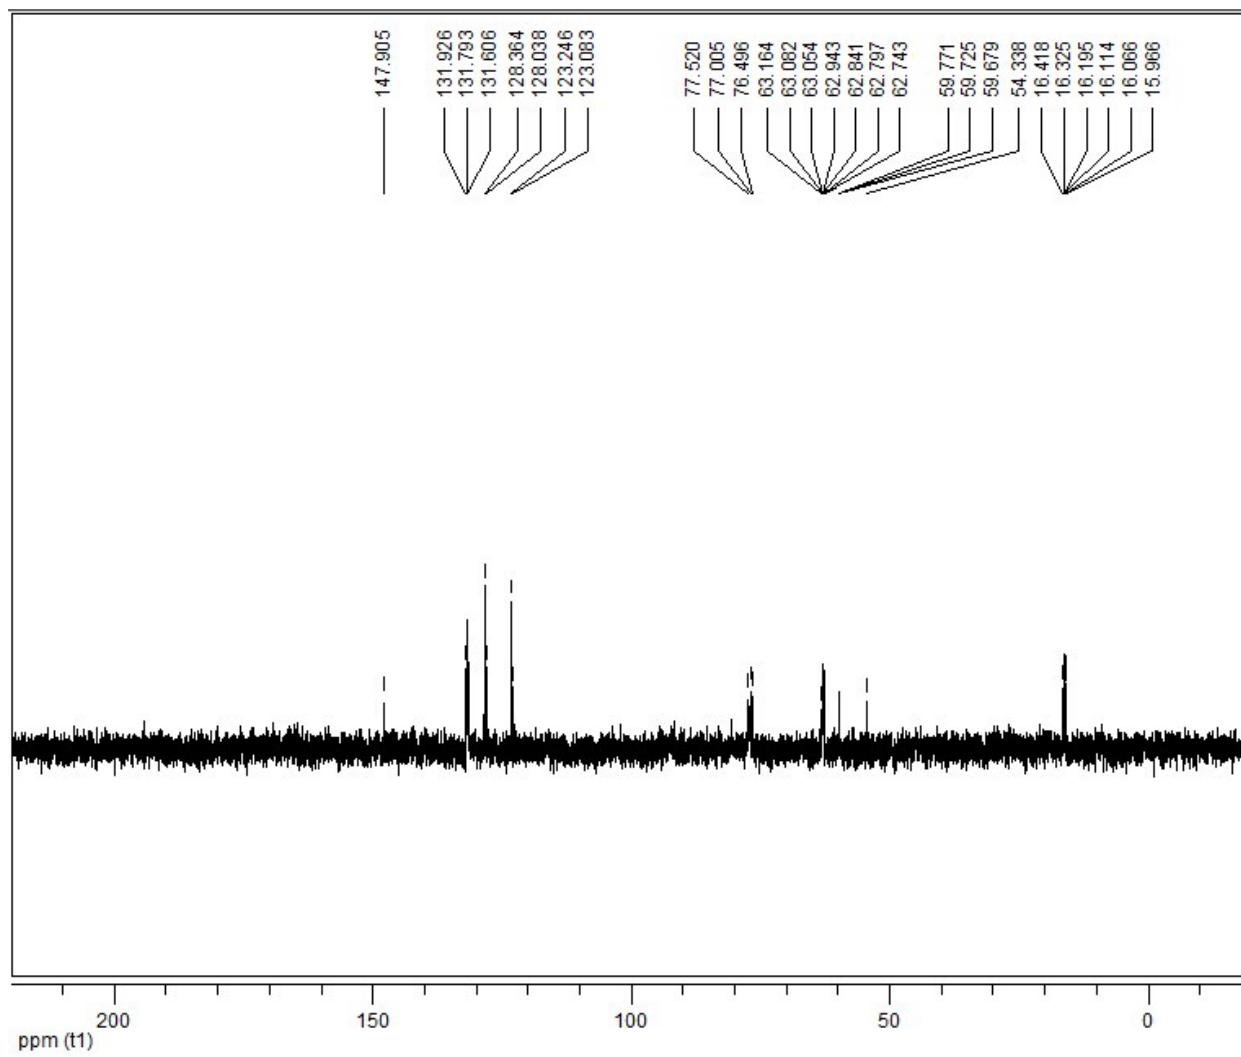

$^{13}\text{C}$  NMR



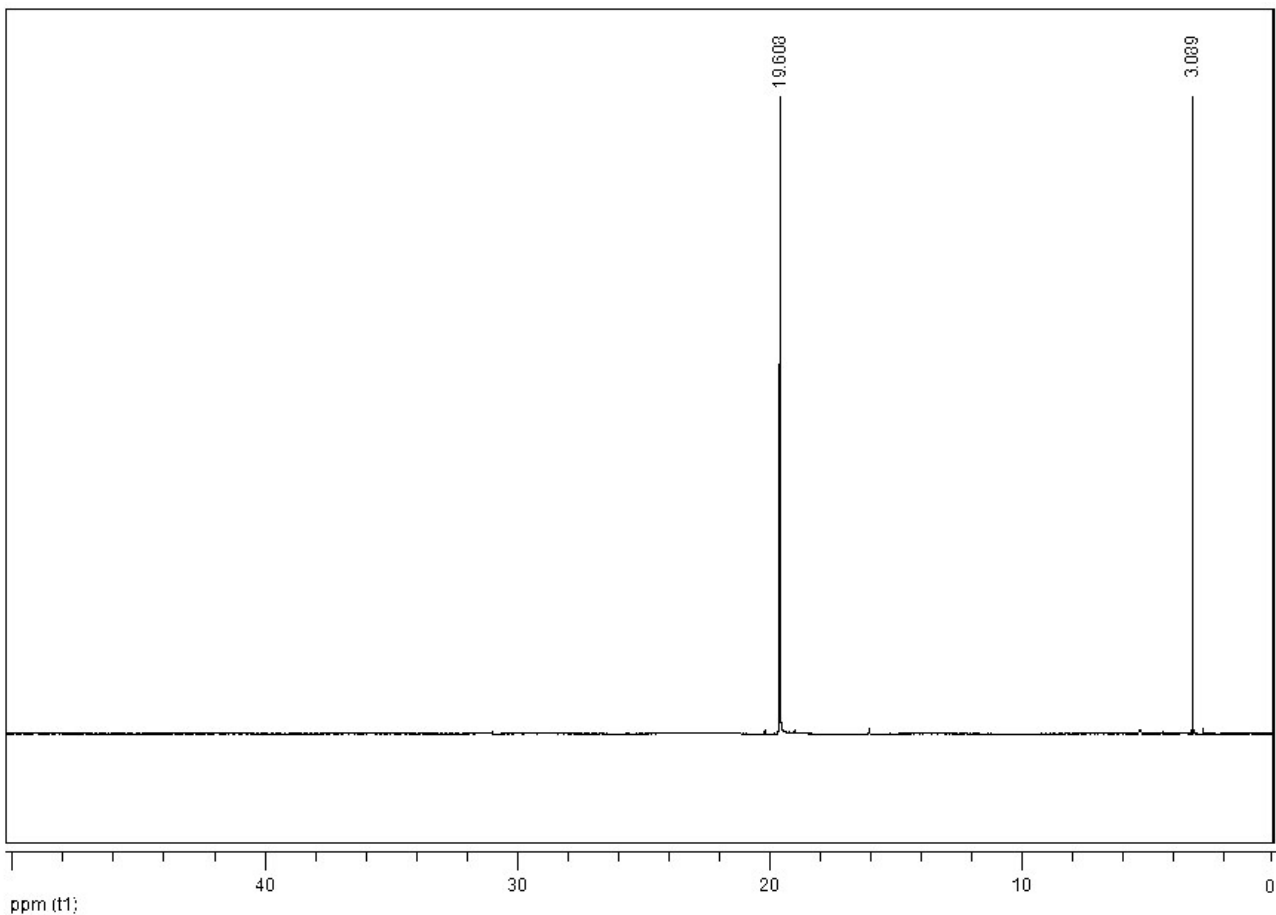

$^{31}\text{P}$  NMR

(2e):

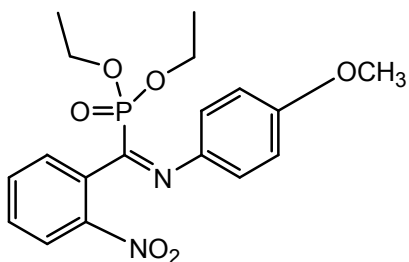

Pale yellow solid (mp: 77-78 °C);  $^1\text{H}$ -NMR ( $\text{CDCl}_3$ , 250 MHz)  $\delta$  (ppm): 8.09-8.07 (m, 1H), 7.75-7.73 (m, 1H), 7.43-7.24 (m, 4H), 7.07-7.03 (m, 2H), 4.01-3.87 (m, 7H), 1.21-1.18 (m, 6H);  $^{13}\text{C}$ -NMR ( $\text{CDCl}_3$ , 62.9 MHz)  $\delta$  (ppm): 161.4, 159.3, 149.7, 132.5, 130.0, 126.8 (d,  $^4\text{J}(\text{C-P})=4.0\text{Hz}$ ), 122.8, 121.2, 120.0, 114.2, 113.6, 62.7 (d, 2CH<sub>2</sub>,  $^2\text{J}(\text{C-P})=5.3\text{Hz}$ ), 55.6 (OCH<sub>3</sub>), 16.0 (d, 2CH<sub>3</sub>,  $^3\text{J}(\text{C-P})=6.4\text{Hz}$ );  $^{31}\text{P}$ -NMR ( $\text{CDCl}_3$ , 162 MHz)  $\delta$  (ppm): 2.76; IR (KBr):  $\nu$  [ $\text{cm}^{-1}$ ] 2985.6, 2931.6, 2839.0, 1643.2, 1604.7, 1512.1, 1450.4, 1388.7, 1296.1, 1249.8, 1172.6, 1026.1, 972.1, 833.2, 756.0; Anal. Calcd for C<sub>18</sub>H<sub>21</sub>N<sub>2</sub>O<sub>6</sub>P: C, 55.10; H, 5.39; N, 7.14. Found: C, 54.85; H, 5.04; N, 6.84.

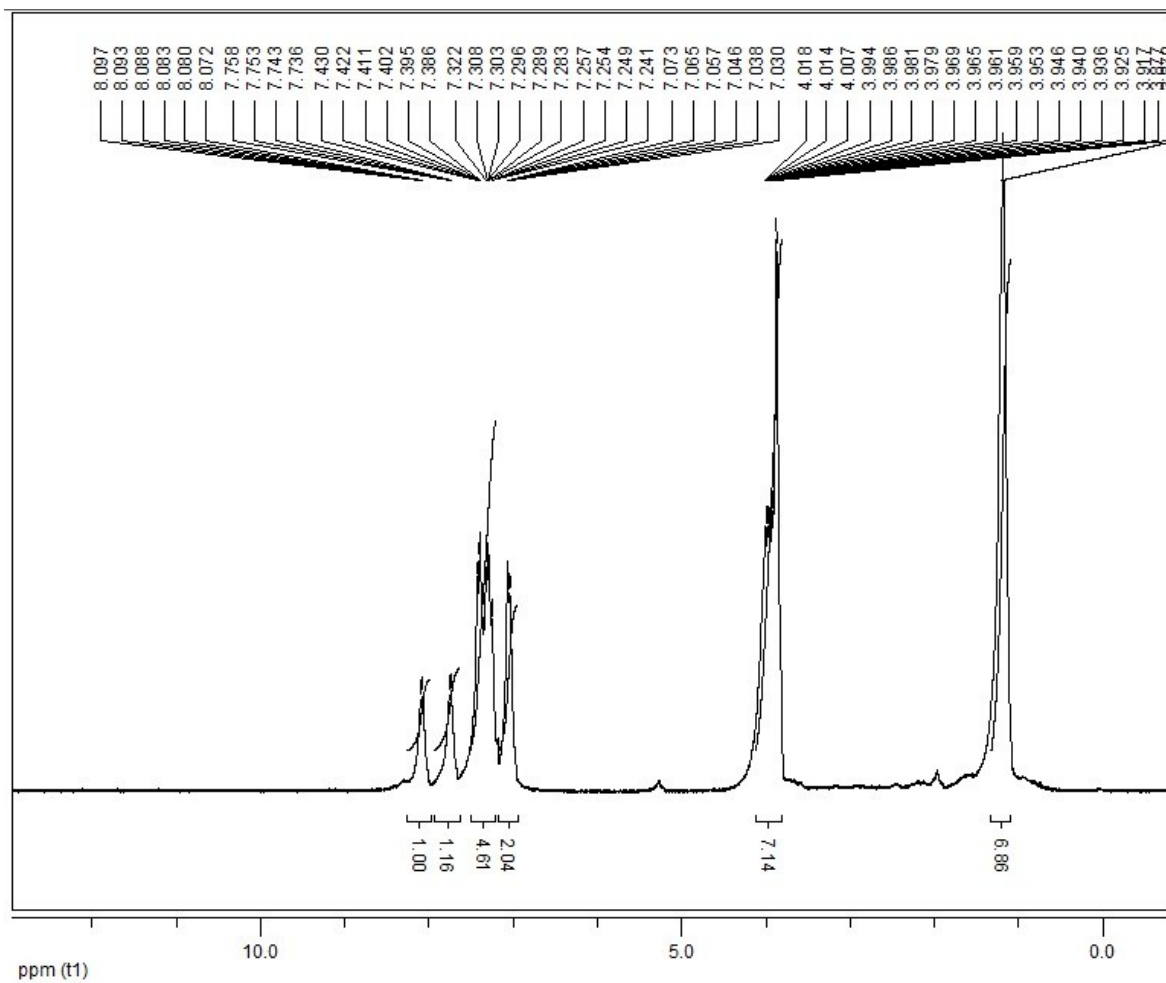

<sup>1</sup>H NMR

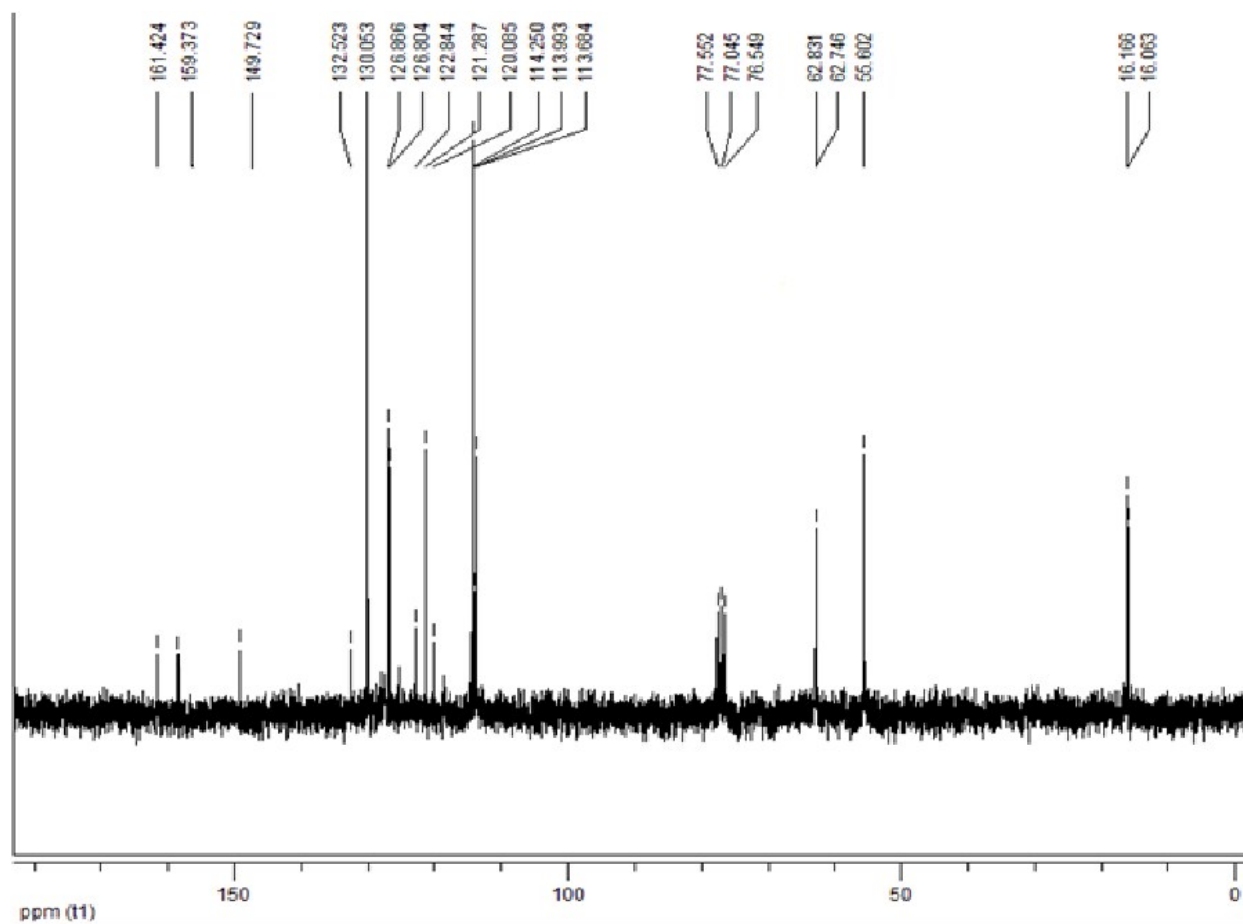

$^{13}\text{C}$  NMR

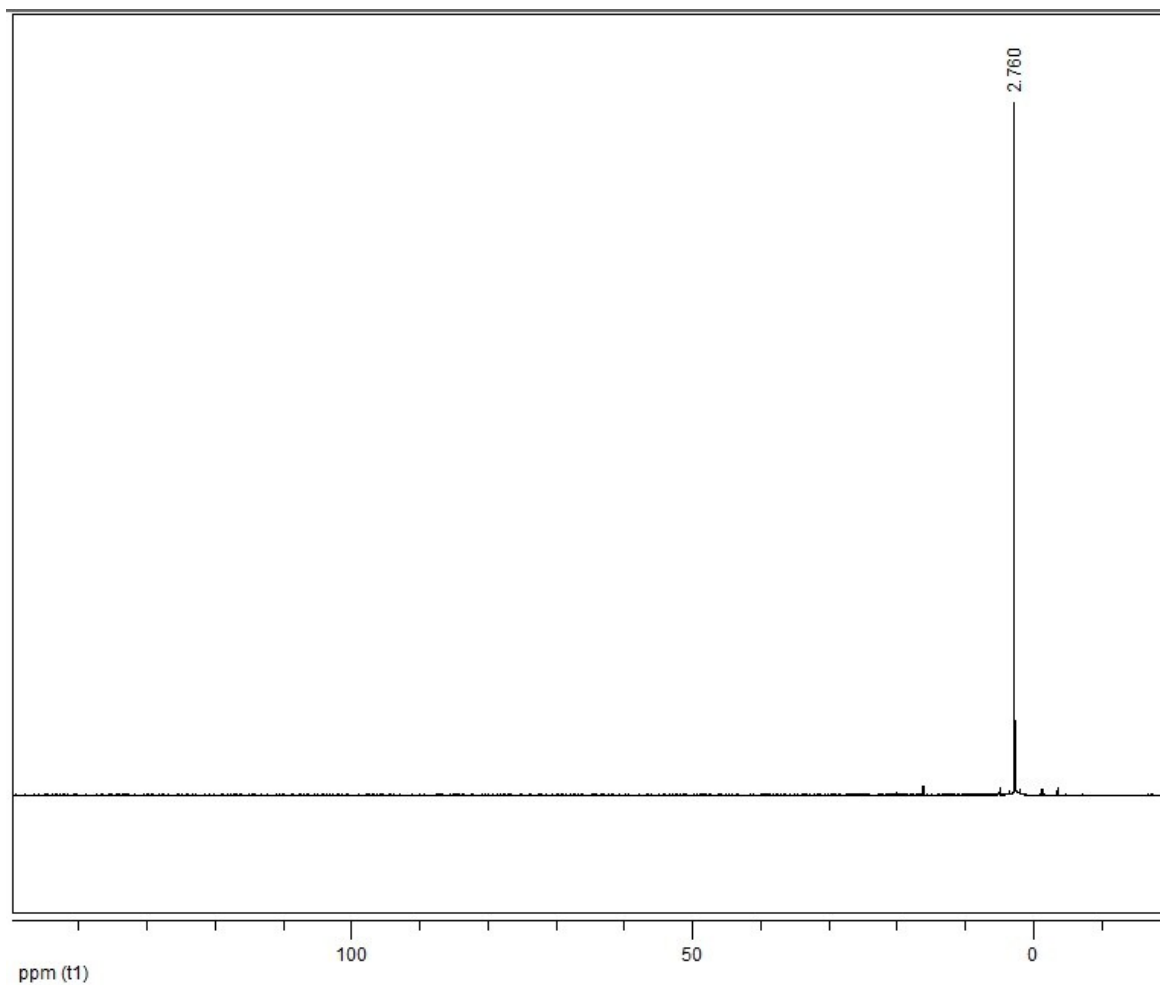

$^{31}\text{P}$  NMR

(2f):

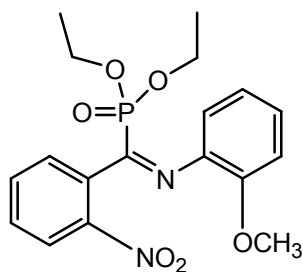

Pale yellow solid (mp: 147-148 °C);  $^1\text{H}$ -NMR ( $\text{CDCl}_3$ , 250 MHz)  $\delta$  (ppm): 8.13-8.08 (m, 1H), 7.79-7.75 (m, 1H), 7.62-7.54 (m, 1H), 7.40-7.25 (m, 4H), 7.12-7.11 (m, 1H), 7.10-7.08 (m, 1H), 4.08-3.81 (m, 4H), 3.78 (d, 3H,  $J = 1.8$  Hz), 1.22 (mt, 3H), 1.13 (mt, 3H);  $^{13}\text{C}$ -NMR ( $\text{CDCl}_3$ , 62.9 MHz)  $\delta$  (ppm): 157.6, 156.2, 147.9, 133.0, 132.3, 130.6, 128.6, 126.6, 126.4, 121.3, 120.4, 113.8, 111.9, 62.6 (d, 2CH<sub>2</sub>,  $^2J(\text{C-P}) = 4.8$  Hz), 55.8 (OCH<sub>3</sub>), 15.9-16.1 (m, 2CH<sub>3</sub>);  $^{31}\text{P}$ -NMR ( $\text{CDCl}_3$ , 162 MHz)  $\delta$  (ppm): 2.50; IR(KBr):  $\nu$  [ $\text{cm}^{-1}$ ] 2977.9, 2893.0, 1604.7, 1504.4, 1473.3, 1300.1,

1280.6, 1249.8, 1164.9, 1010.6, 979.8, 840.9, 763.8; MS (70 eV, EI): m/z (%): 392, M<sup>+</sup>(1.1), 223 (100.0); Anal. Calcd for C<sub>18</sub>H<sub>21</sub>N<sub>2</sub>O<sub>6</sub>P: C, 55.10; H, 5.39; N, 7.14. Found: C, 55.38; H, 5.74; N, 7.46.

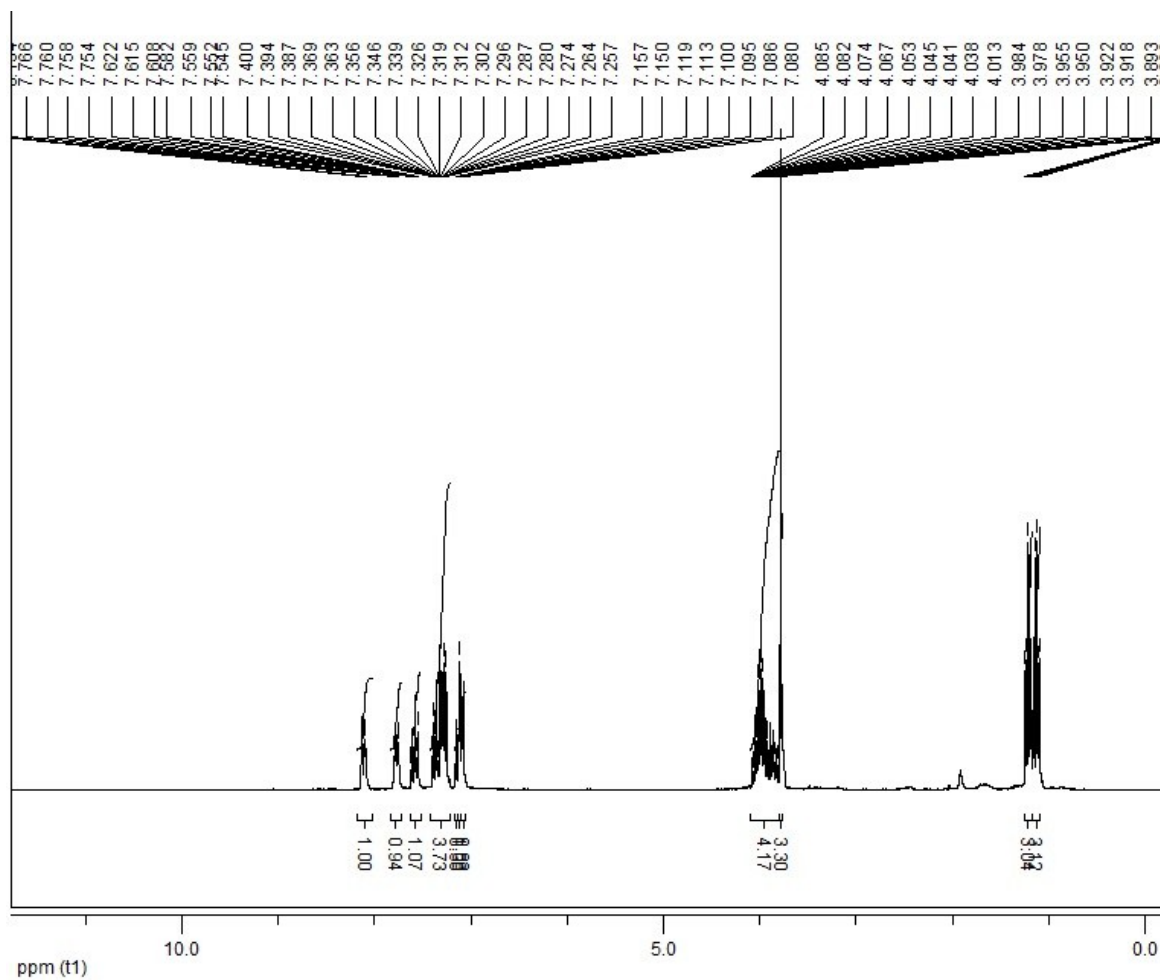

<sup>1</sup>H NMR

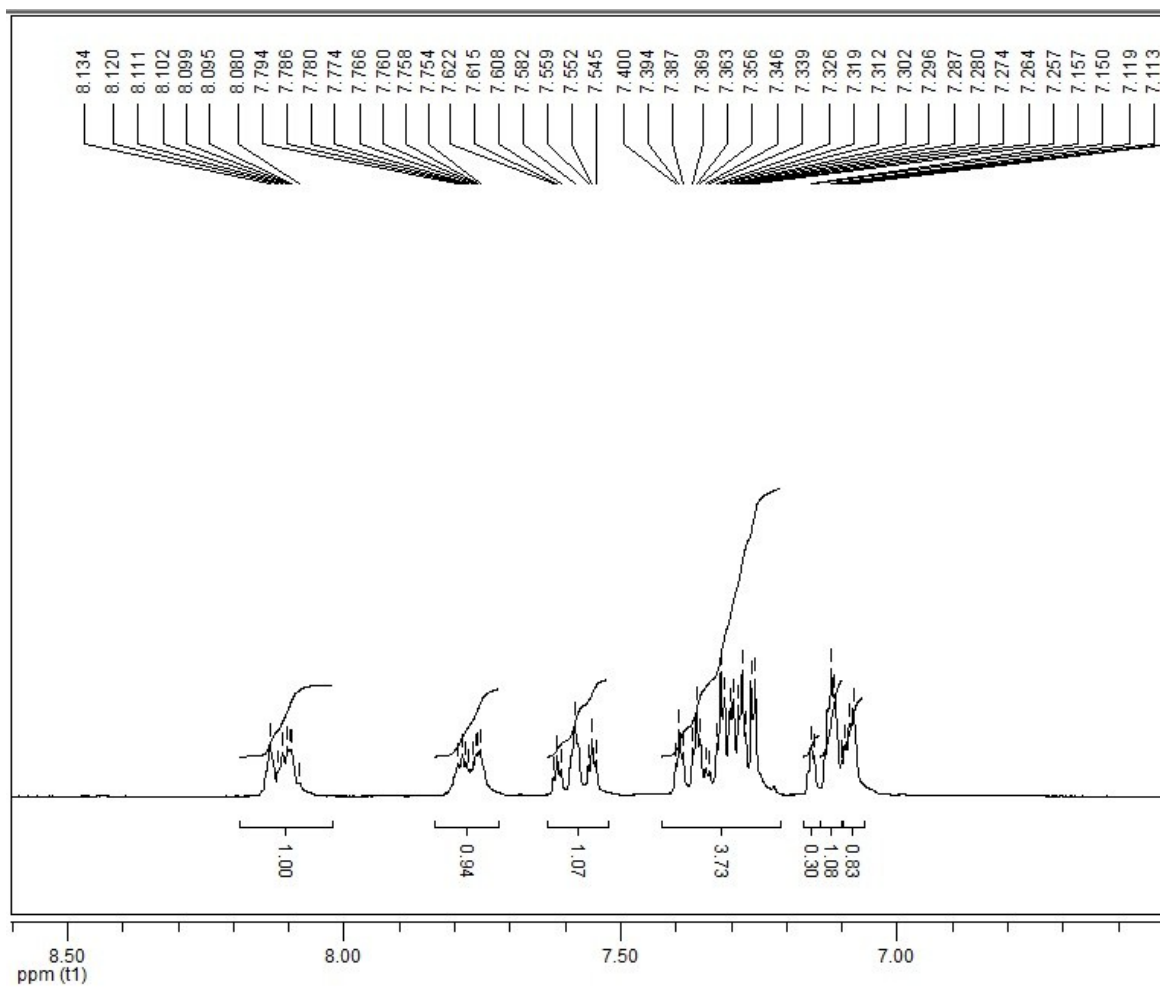

Expanded  $^1\text{H}$  NMR of aromatic area

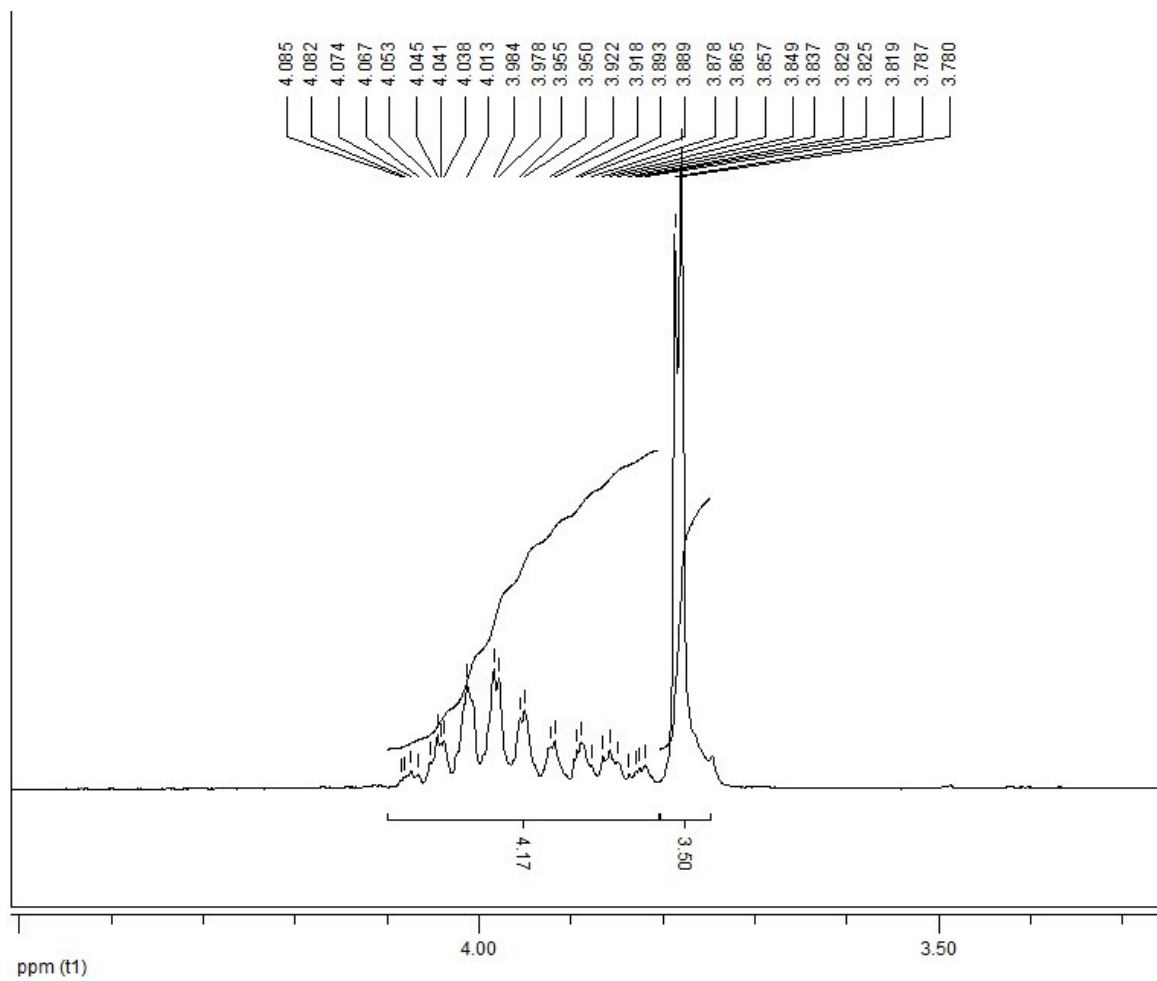

**Expanded  $^1\text{H}$  NMR of  $-\text{CH}_2$  and  $-\text{OCH}_3$**

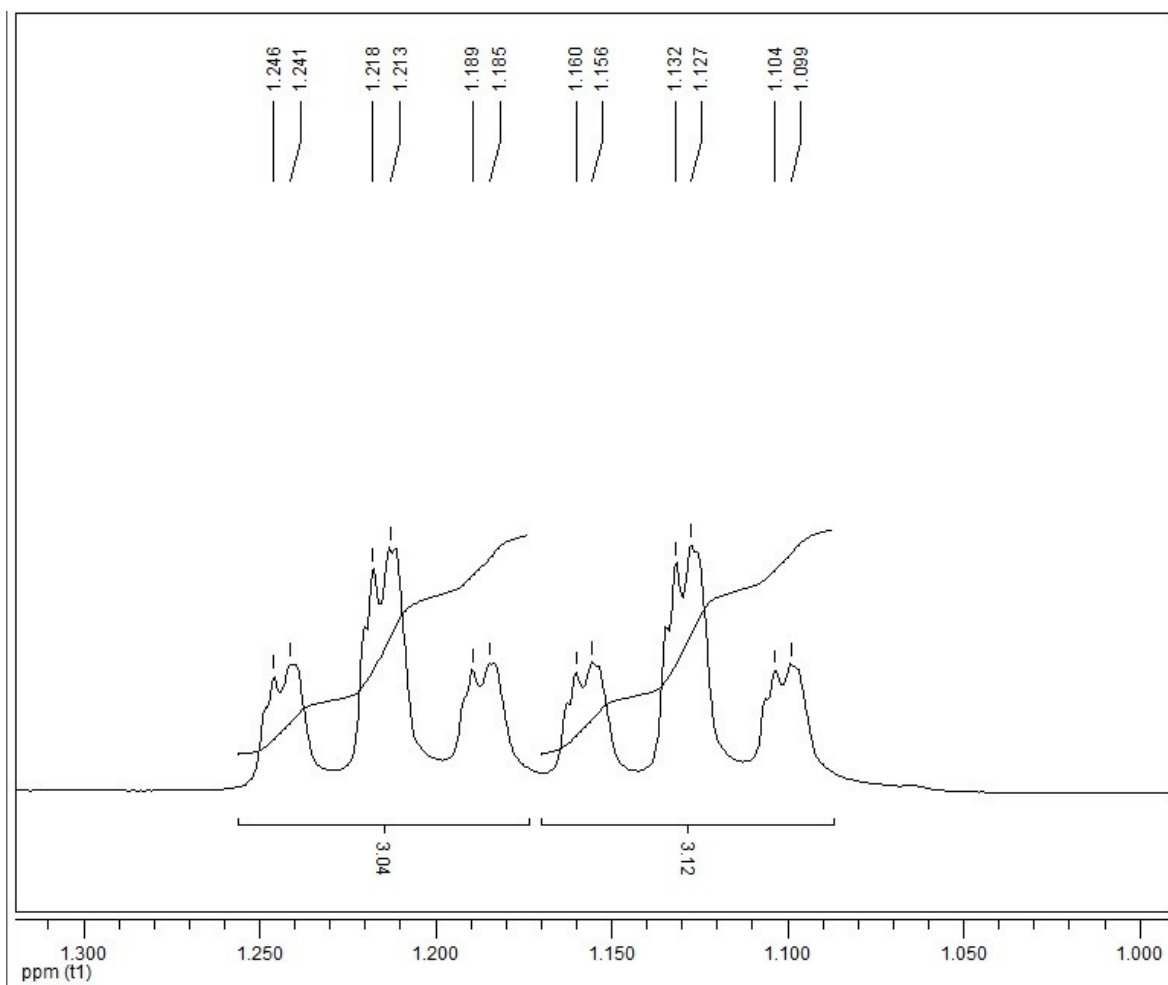

**Expanded  $^1\text{H}$  NMR of  $-\text{CH}_3$**



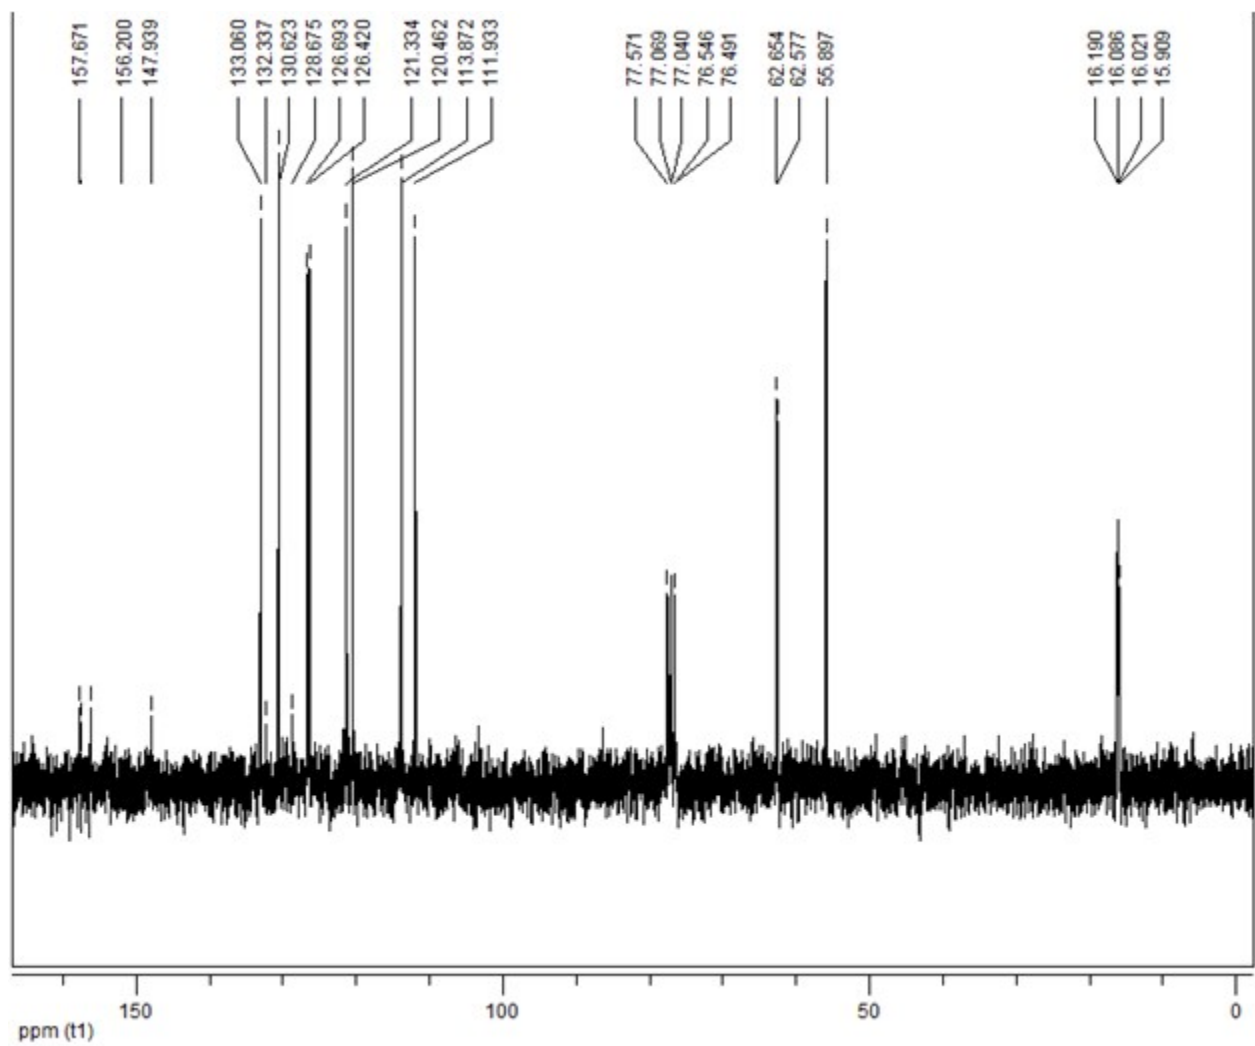

$^{13}\text{C}$  NMR

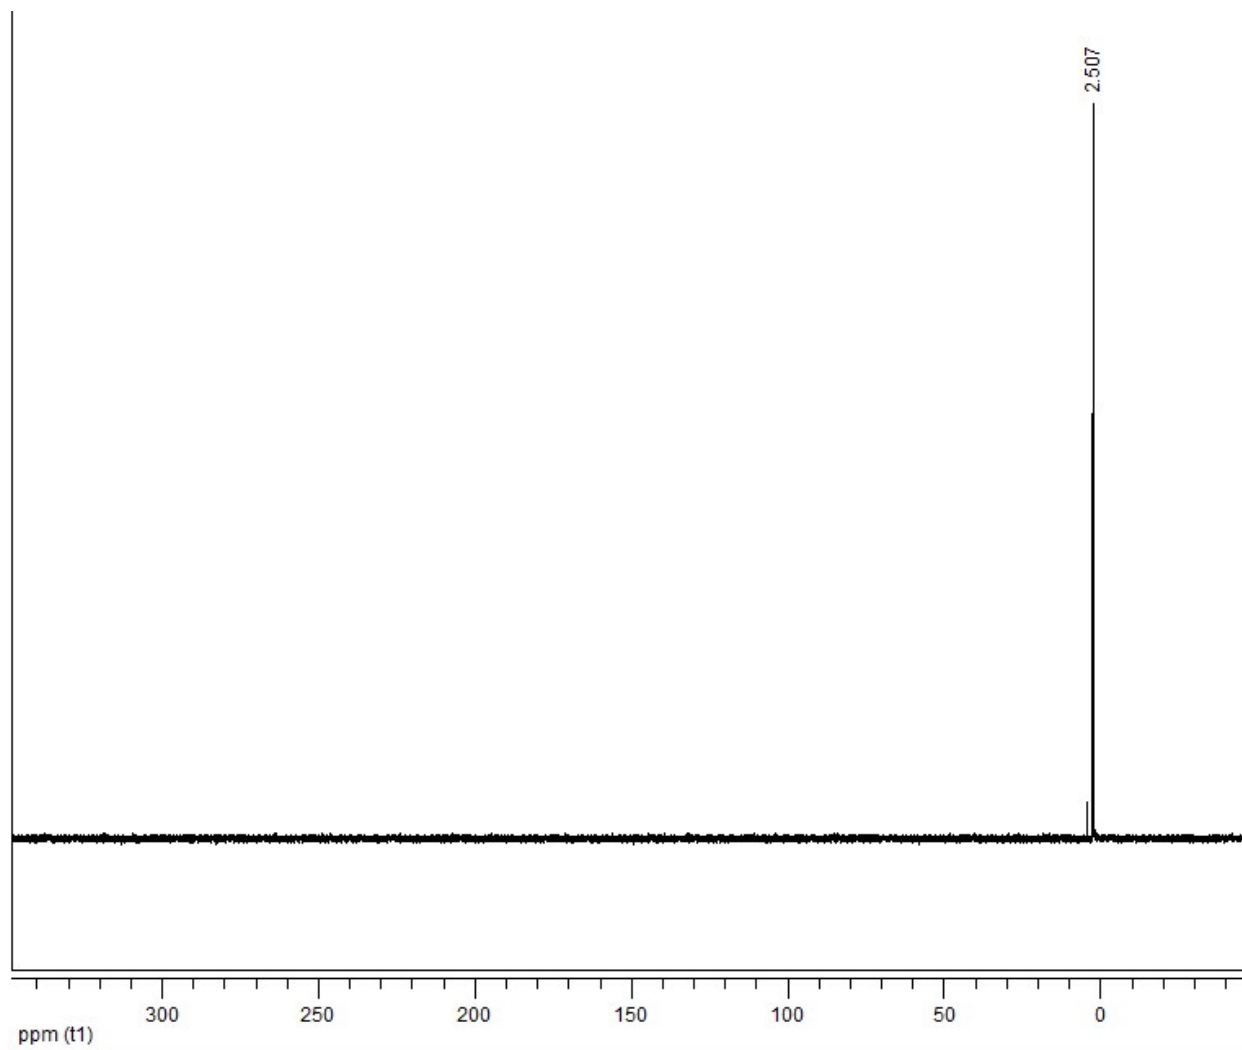

$^{31}\text{P}$  NMR

(2g):

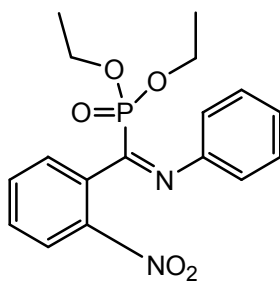

Yellow oil,  $^1\text{H}$ -NMR ( $\text{CDCl}_3$ , 250 MHz)  $\delta$  (ppm): 8.12-8.09 (m, 1H), 7.78-7.74 (m, 1H), 7.60-7.50 (m, 5H), 7.33-7.30 (m, 2H), 4.03-3.91 (m, 4H), 1.16 (t, 6H,  $J=7\text{Hz}$ );  $^{13}\text{C}$ -NMR ( $\text{CDCl}_3$ , 62.9 MHz)  $\delta$  (ppm): 157.9, 156.8, 151.8, 141.3, 132.9, 131.0, 129.0, 128.7, 126.9 (d,  $^3J(\text{C-P})=6.3\text{Hz}$ ),

121.3, 113.7, 62.8 (d, 2CH<sub>2</sub>, <sup>2</sup>J(C-P)= 5.6Hz), 16.0 (d, 2CH<sub>3</sub>, <sup>3</sup>J(C-P)= 6.7Hz); <sup>31</sup>P-NMR (CDCl<sub>3</sub>, 162 MHz) δ (ppm): 4.49; IR (KBr): ν [cm<sup>-1</sup>]2985.6, 2931.6,1658.7,1596.9, 1504.4, 1473.5, 1388.7, 1257.5, 1164.9, 1110.9, 1049.2, 1010.6, 979.8, 840.9, 748.3;MS (70 eV, EI): m/z (%): 362, M<sup>+</sup>(0.4), 179 (100.0);Anal. Calcd for C<sub>17</sub>H<sub>19</sub>N<sub>2</sub>O<sub>5</sub>P: C, 56.35; H, 5.29; N, 7.73. Found: C, 56.05; H, 5.01; N, 7.50.

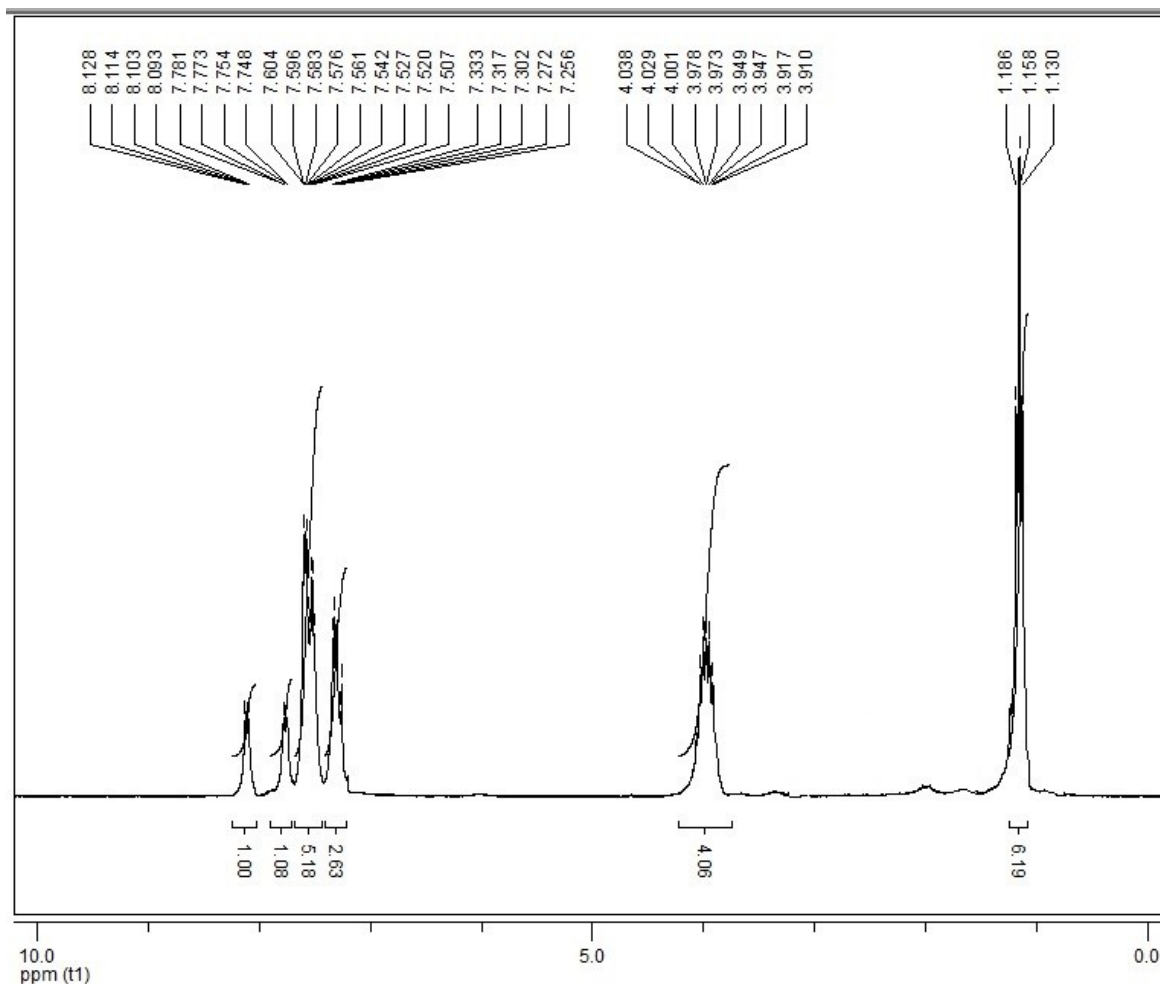

<sup>1</sup>H NMR

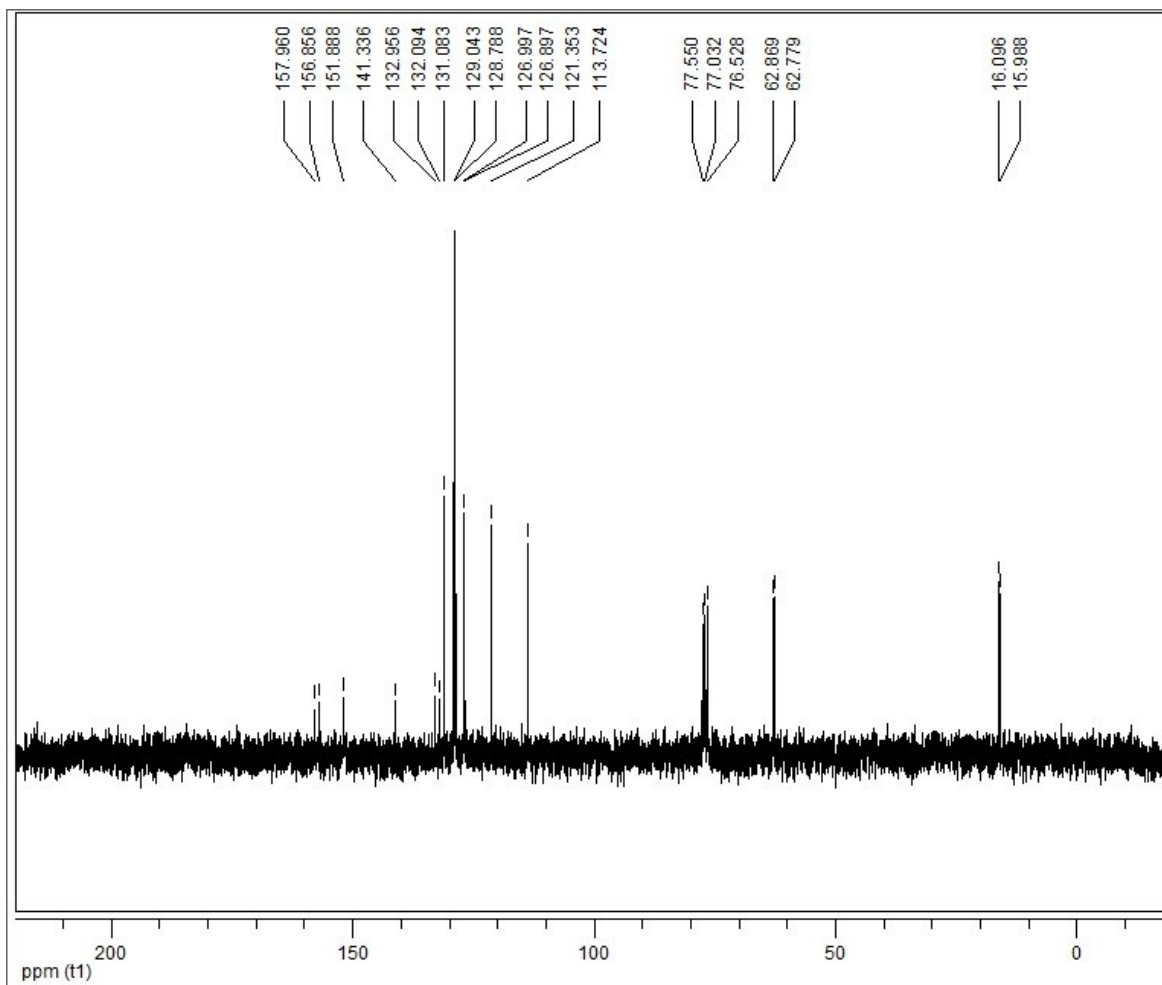

$^{13}\text{C}$  NMR

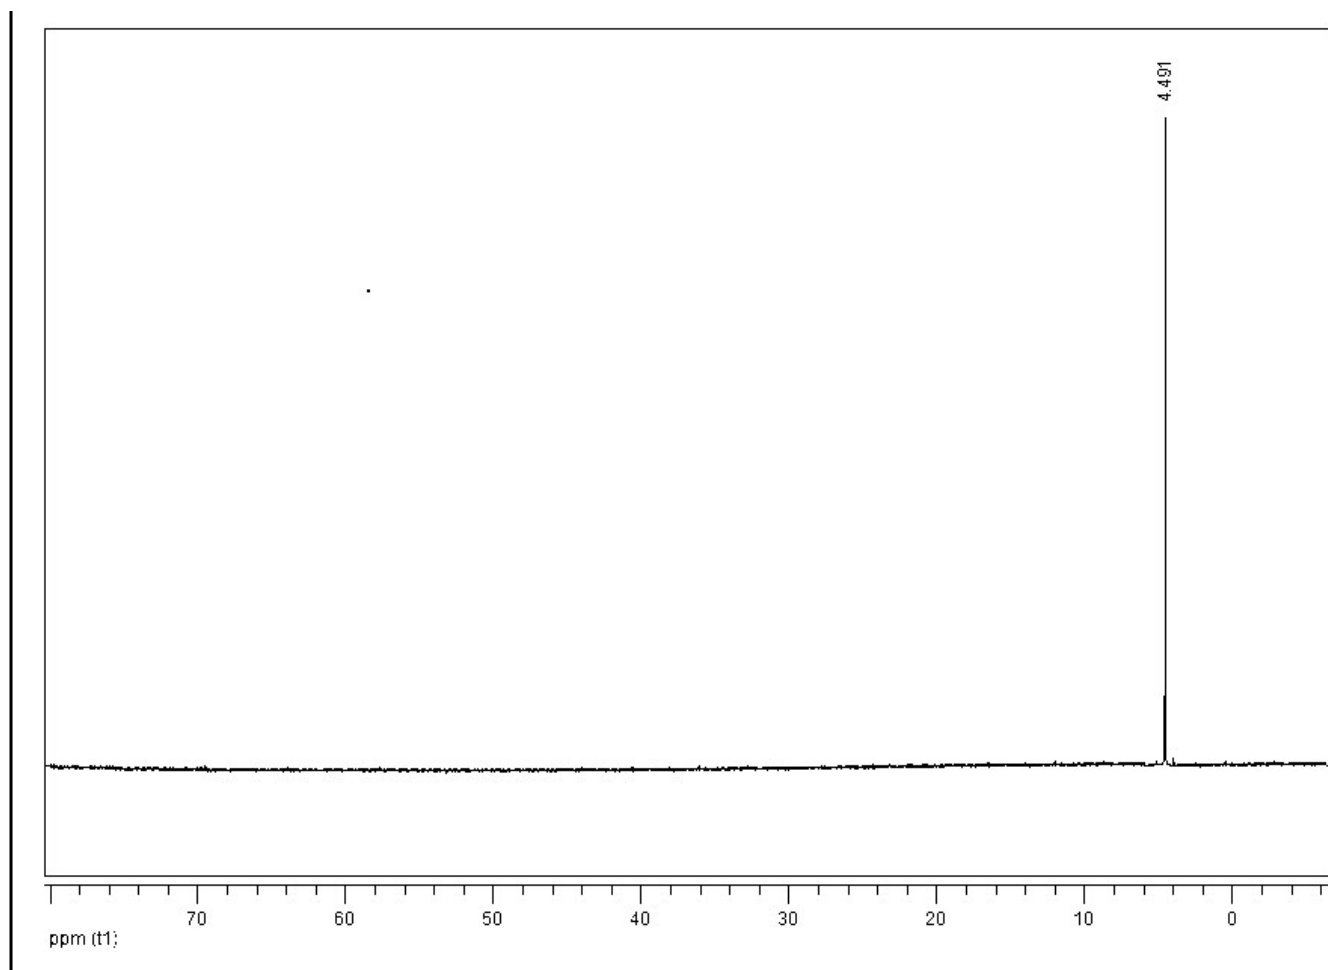

$^{31}\text{P}$  NMR

(2h):

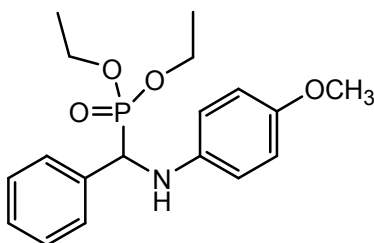

Pale yellow solid (mp: 67-70 °C, Lit. 70-73°C);  $^{12}\text{H}$ -NMR ( $\text{CDCl}_3$ , 250 MHz)  $\delta$  (ppm): 7.39-7.36 (m, 2H), 7.27-7.17 (m, 3H), 6.61 (d, 2H,  $J=9$  Hz), 6.46 (d, 2H,  $J=9$  Hz), 4.68-4.49 (m, 2H), 4.10-3.81 (m, 4H), 3.60 (d, 3H,  $J=4$  Hz), 1.20 (t, 3H,  $J=7$  Hz), 1.03 (t, 3H,  $J=7$  Hz);  $^{13}\text{C}$ -NMR ( $\text{CDCl}_3$ , 62.9 MHz)  $\delta$  (ppm): 152.6, 140.4, 140.2, 136.0 (d,  $^2J(\text{C-P})=2.8$  Hz), 128.5, 127.8, 115.1, 114.6, 63.1-63.2 (m, 2C, -CH<sub>2</sub>-), 58.1 (1C, -OCH<sub>3</sub>), 55.6 (d, -CH-,  $^1J(\text{C-P})=8.2$  Hz), 16.1-16.4 (m, 2C, -CH<sub>3</sub>); IR(KBr):  $\nu$  [ $\text{cm}^{-1}$ ] 3301.9, 2990.0, 2895.5, 2820.9, 1512.1, 1450.6, 1380.1, 1234.4, 1026.1, 964.3, 800.1, 750.9, 686.6.

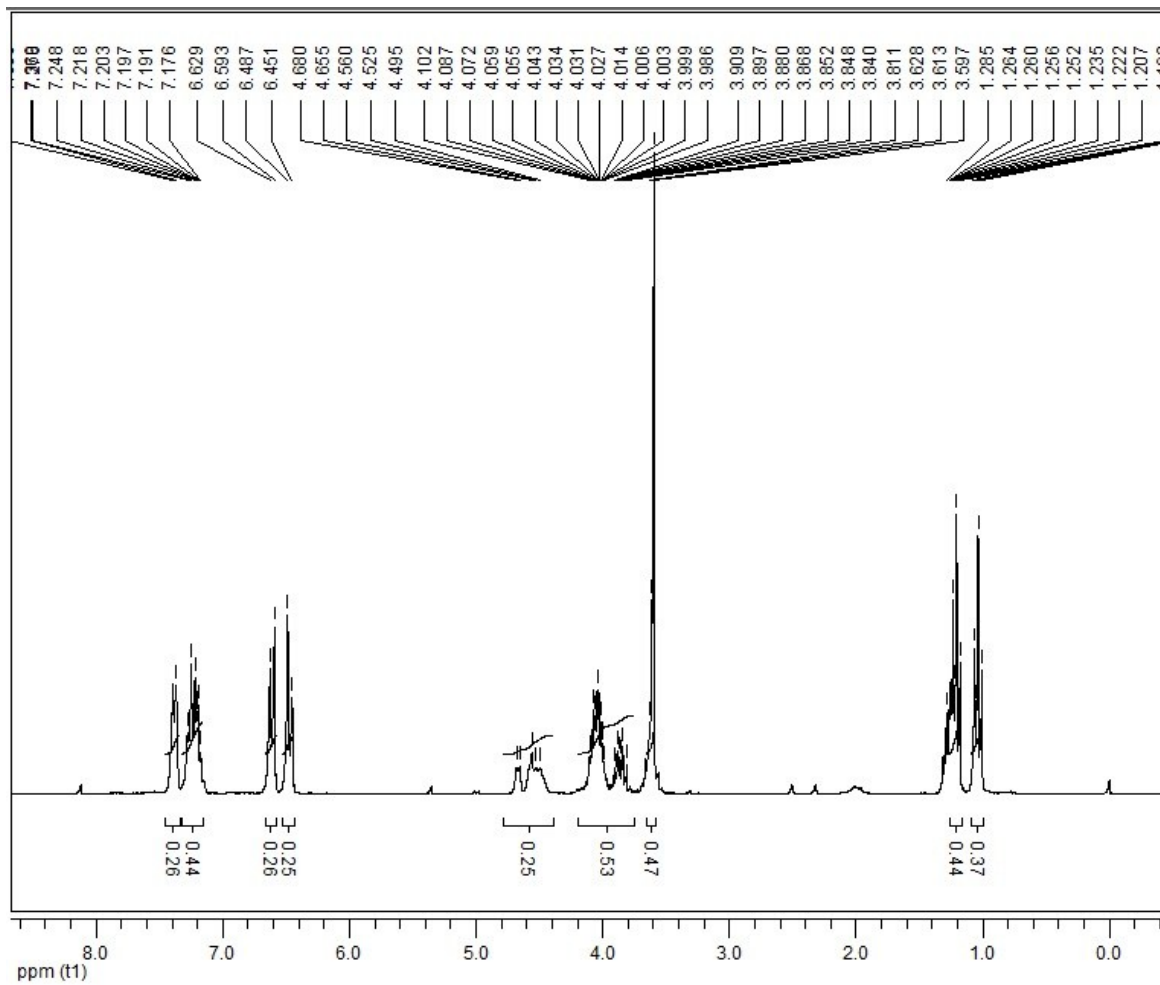

<sup>1</sup>H NMR

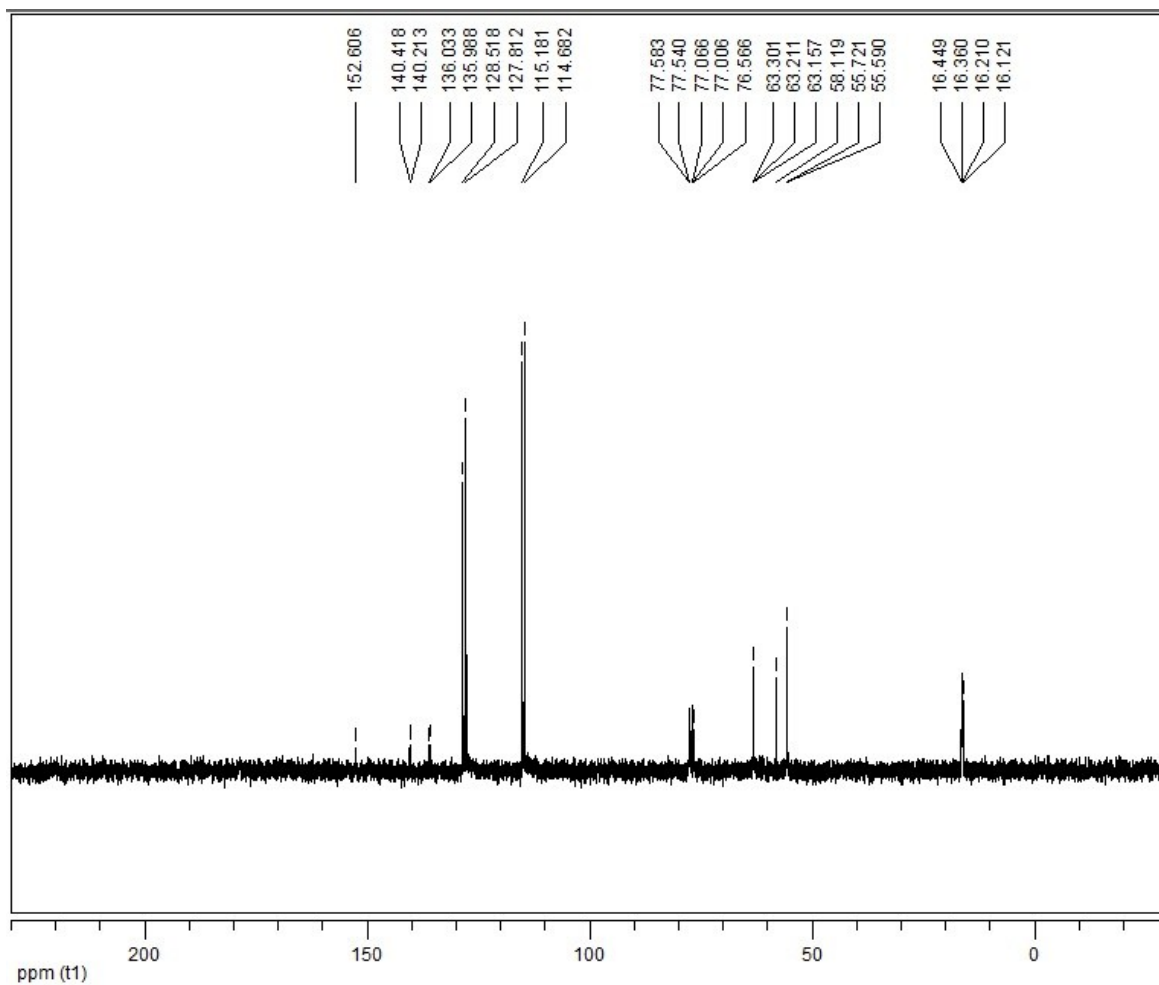

$^{13}\text{C}$  NMR

(2k):

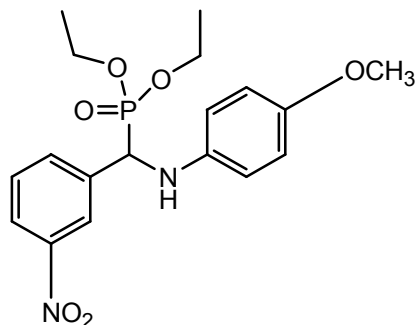

Pale yellow solid (mp: 99.7-100.5 °C);<sup>23</sup>  $^1\text{H}$ -NMR (CDCl<sub>3</sub>, 250 MHz)  $\delta$  (ppm): 8.32-8.31 (m, 1H), 8.12 (d, 1H, J= 8Hz), 7.81 (d, 1H, J= 7Hz), 7.50 (t, 1H, J= 8Hz), 6.69 (d, 2H, J= 9Hz), 6.51 (d, 2H, J=9Hz), 4.78 (d, 1H, 24.5Hz), 4.62-4.61 (m, 1H), 4.20-3.82 (m, 4H), 3.68 (d, 3H, J= 2.0

Hz), 1.29 (t, 3H, J= 7Hz), 1.17 (t, 3H, J= 7Hz);  $^{13}\text{C}$ -NMR ( $\text{CDCl}_3$ , 62.9 MHz)  $\delta$  (ppm): 153.0, 148.3, 139.6, 139.4, 139.0, 133.8 (d,  $^4\text{J}(\text{C-P})= 4.8\text{Hz}$ ), 129.5, 122.8 (d,  $^5\text{J}(\text{C-P})= 6.0\text{Hz}$ ), 115.1, 114.8, 63.2- 63.7 (m, 2C,  $-\text{CH}_2-$ ), 57.6 (1C,  $-\text{OCH}_3$ ), 55.4 (d,  $-\text{CH}-$ ,  $^1\text{J}(\text{C-P})= 16.6\text{Hz}$ ), 16.1-16.4 (m, 2C,  $-\text{CH}_3$ ); IR (KBr):  $\nu$  [ $\text{cm}^{-1}$ ] 3294.2, 2985.6, 2931.6, 2831.3, 1512.1, 1447.7, 1350.1, 1234.4, 1026.1, 972.1, 817.8, 686.6; MS (70 eV, EI): m/z (%):394,  $\text{M}^+$  (9.1), 257 (100.0).

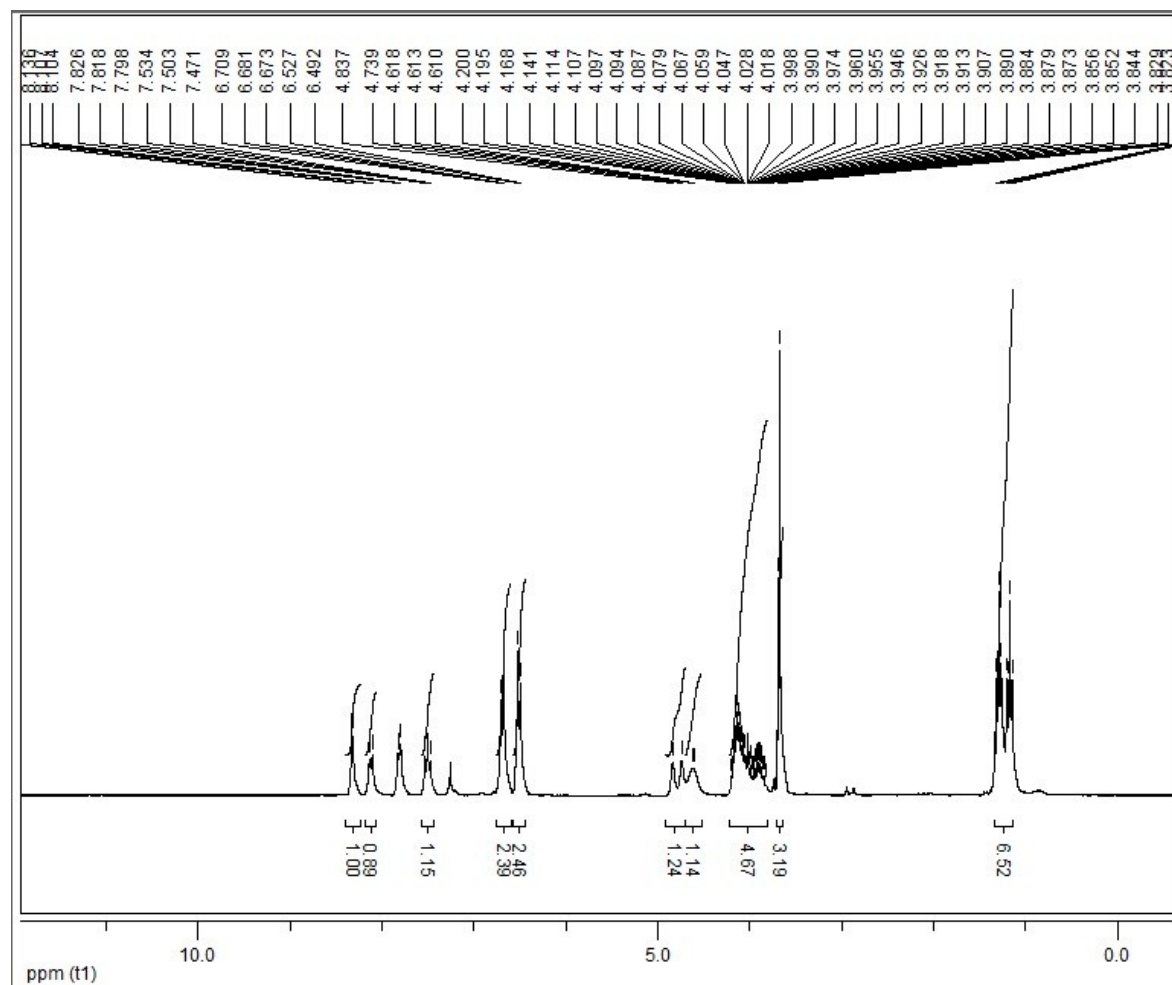

$^1\text{H}$  NMR



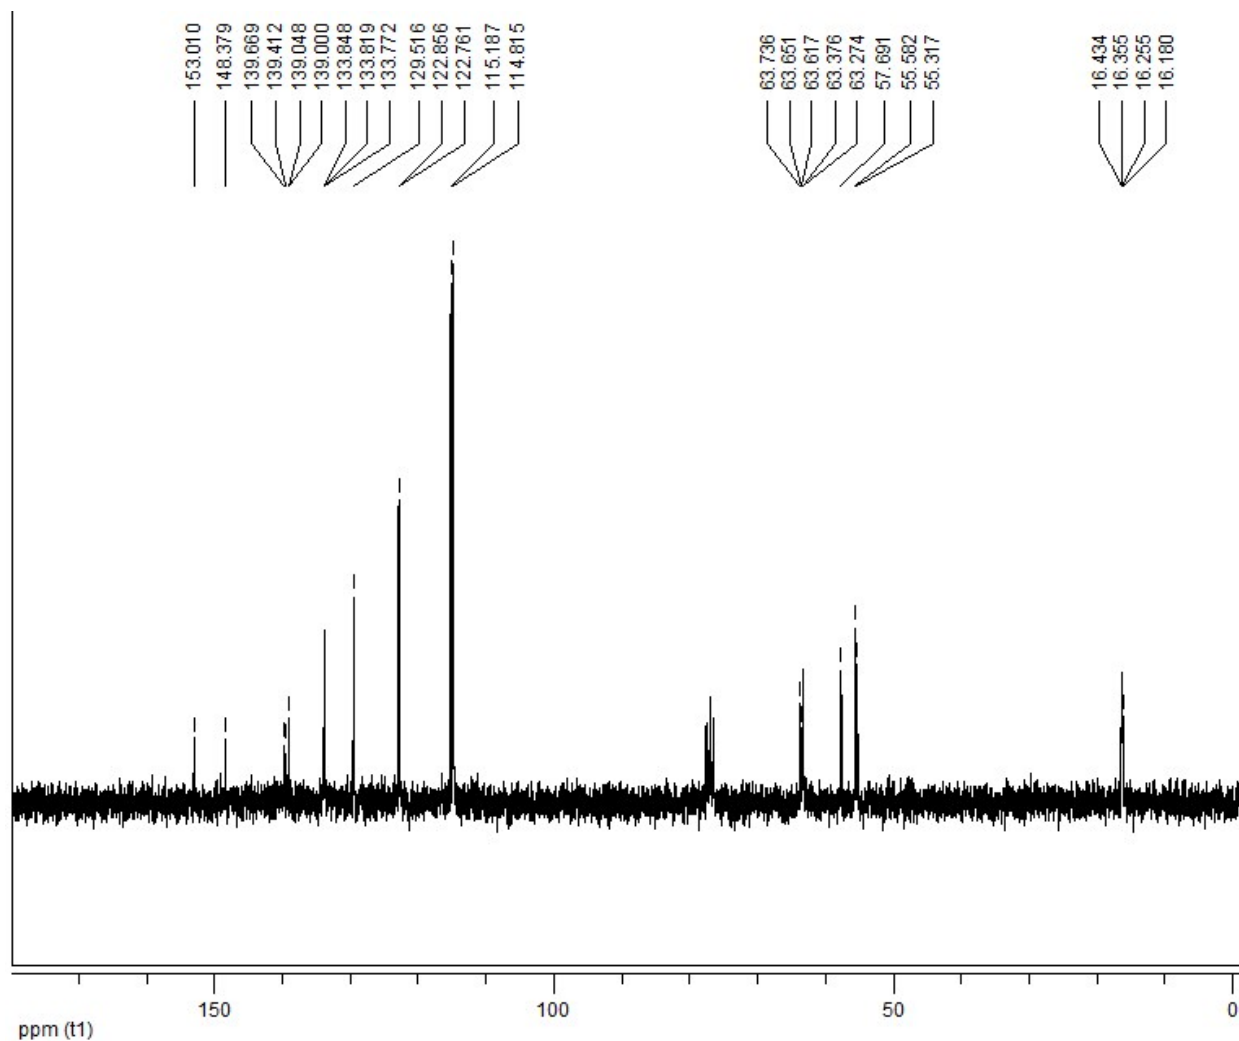

<sup>13</sup>C NMR

(2I):

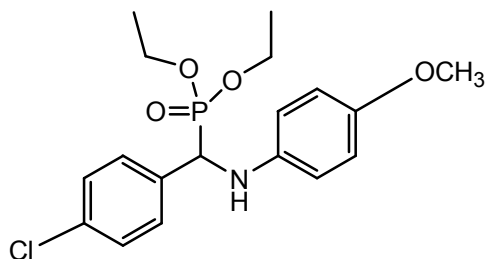

Yellow solid (mp: 99.5-100 °C);<sup>24</sup> <sup>1</sup>H-NMR (CDCl<sub>3</sub>, 250 MHz) δ (ppm): 7.40-7.36 (m, 2H), 7.30-7.25 (m, 2H), 6.67 (dd, 2H, J = 9.7 Hz, J' = 2.7 Hz), 6.50 (dd, 2H, J = 8.8 Hz, J' = 2.2 Hz), 4.70 (broad s, 1H), 4.60 (broad s, 1H), 4.14-3.70 (m, 4H), 3.65 (d, 3H, J = 3.2 Hz), 1.27 (mt, 3H), 1.14 (mt, 3H); <sup>13</sup>C-NMR (CDCl<sub>3</sub>, 62.9 MHz) δ (ppm): 152.7, 140.0 (d, <sup>3</sup>J(C-P) = 15.5 Hz), 134.8 (d, <sup>5</sup>J(C-P) = 2.6 Hz), 133.5 (d, <sup>2</sup>J(C-P) = 4.0 Hz), 129.2 (d, <sup>3</sup>J(C-P) = 5.5 Hz), 128.6 (d, <sup>4</sup>J(C-P) = 2.7 Hz),

115.2, 114.7, 63.1-63.4 (m, 2C, -CH<sub>3</sub>), 56.3 (d, -CH-, <sup>1</sup>J(C-P)= 150.6Hz), 55.5 (OCH<sub>3</sub>), 16.1-16.4 (m, 2C, -CH<sub>3</sub>); IR (KBr): ν [cm<sup>-1</sup>] 3309.6, 2993.9, 1512.1, 1396.4, 1242.1, 1164.9, 1018.3, 964.3, 825.5.

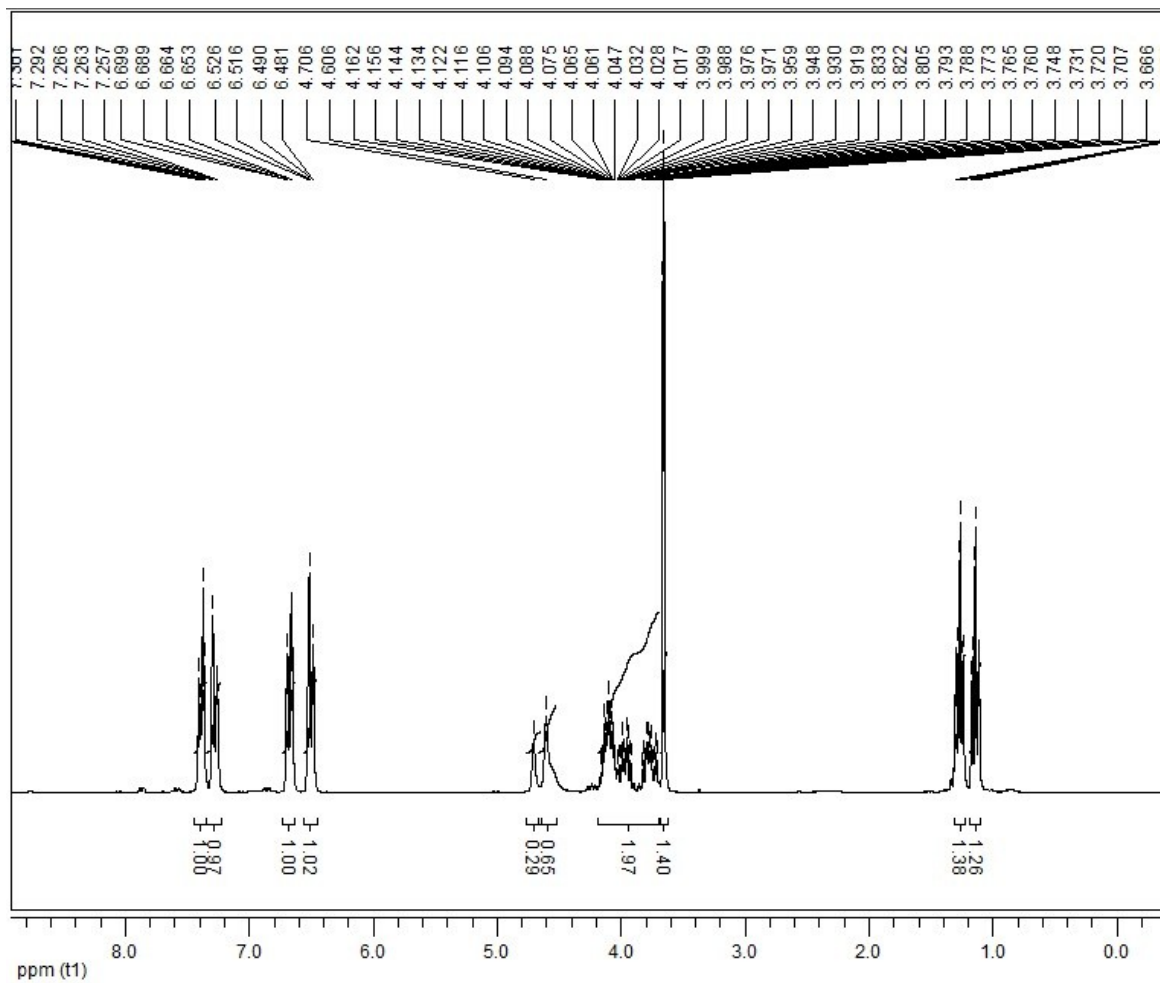

<sup>1</sup>H NMR

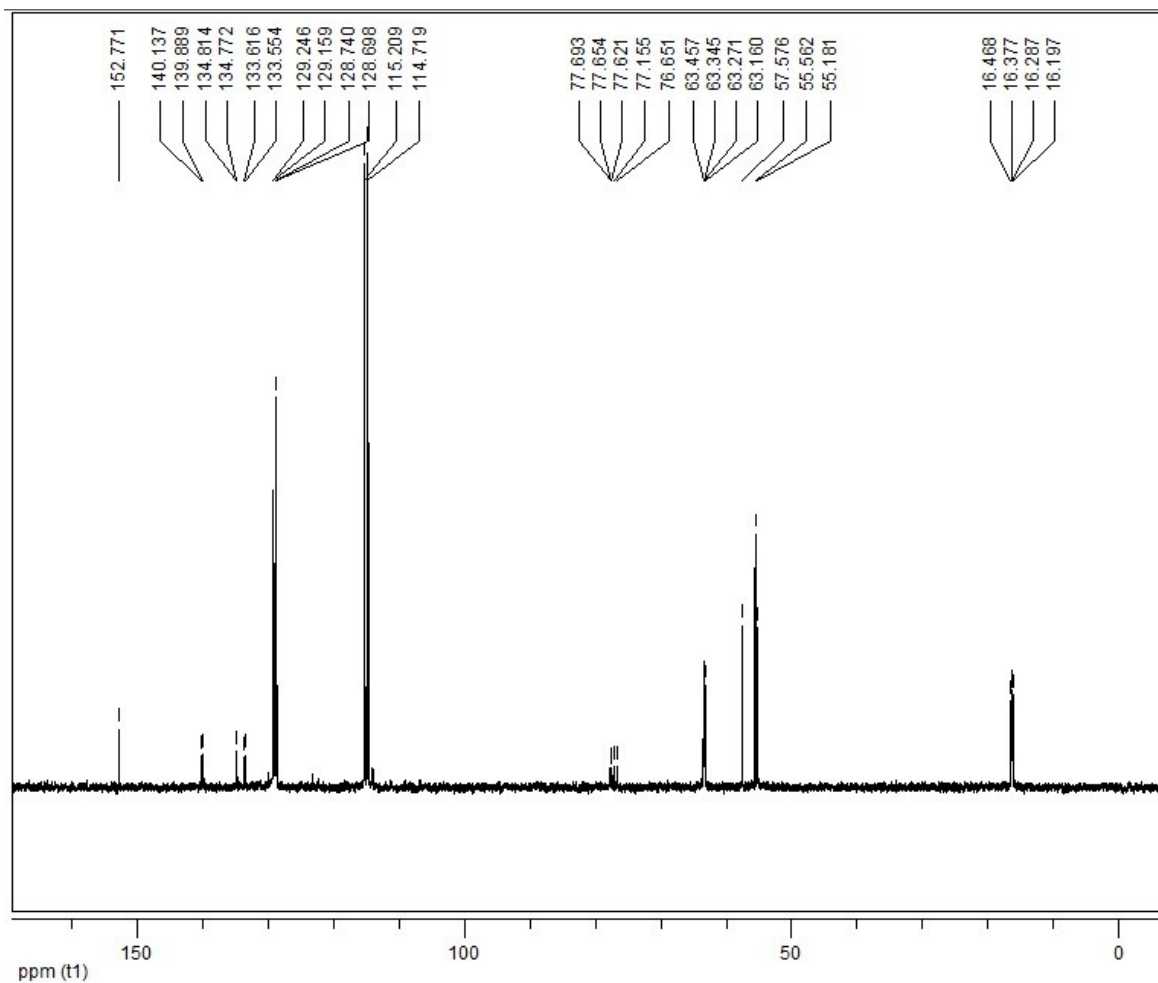

$^{13}\text{C}$  NMR

(2m):

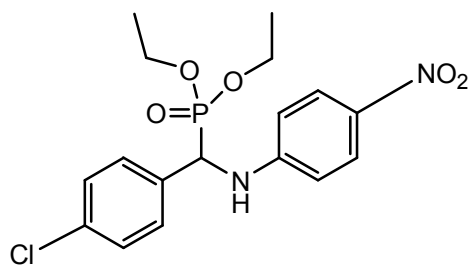

Pale yellow solid (mp: 135-136 °C, Lit. 131-132 °C );<sup>25</sup>  $^1\text{H}$ -NMR ( $\text{CDCl}_3$ , 250 MHz)  $\delta$  (ppm): 7.97 (d, 2H,  $J = 9\text{Hz}$ ), 7.40 (dd, 2H,  $J = 8.7\text{Hz}$ ,  $J' = 2.2\text{Hz}$ ), 7.29 (d, 2H,  $J = 8.5\text{Hz}$ ), 6.58 (d, 2H,  $J = 9.2\text{Hz}$ ), 6.39-6.33 (m, 1H), 4.89 (dd, 1H,  $J = 24.2\text{Hz}$ ,  $J' = 7.7\text{Hz}$ ), 4.21-3.92 (m, 4H), 1.28 (t, 3H,  $J = 7\text{Hz}$ ), 1.15 (t, 3H, 7Hz);  $^{13}\text{C}$ -NMR ( $\text{CDCl}_3$ , 62.9 MHz)  $\delta$  (ppm): 152.0 (d,  $^3J(\text{C-P}) = 13.7\text{Hz}$ ), 138.9, 134.3 (d,  $^2J(\text{C-P}) = 3.8\text{Hz}$ ), 133.3 (d,  $^5J(\text{C-P}) = 3.0\text{Hz}$ ), 129.1, 129.0 (d,  $^3J(\text{C-P}) = 2.7\text{Hz}$ ), 126.0, 112.3, 63.5-63.9 (m, 2C, -CH<sub>3</sub>), 54.8 (d, -CH-,  $^1J(\text{C-P}) = 152.4\text{Hz}$ ), 16.1-16.4 (m, 2C, -

CH<sub>2</sub>-); IR (KBr):  $\nu$  [cm<sup>-1</sup>] 3271.0, 3078.2, 2977.9, 2916.2, 1596.9, 1488.9, 1319.2, 1234.3, 1103.2, 1033.8, 964.3, 840.9, 740.6.

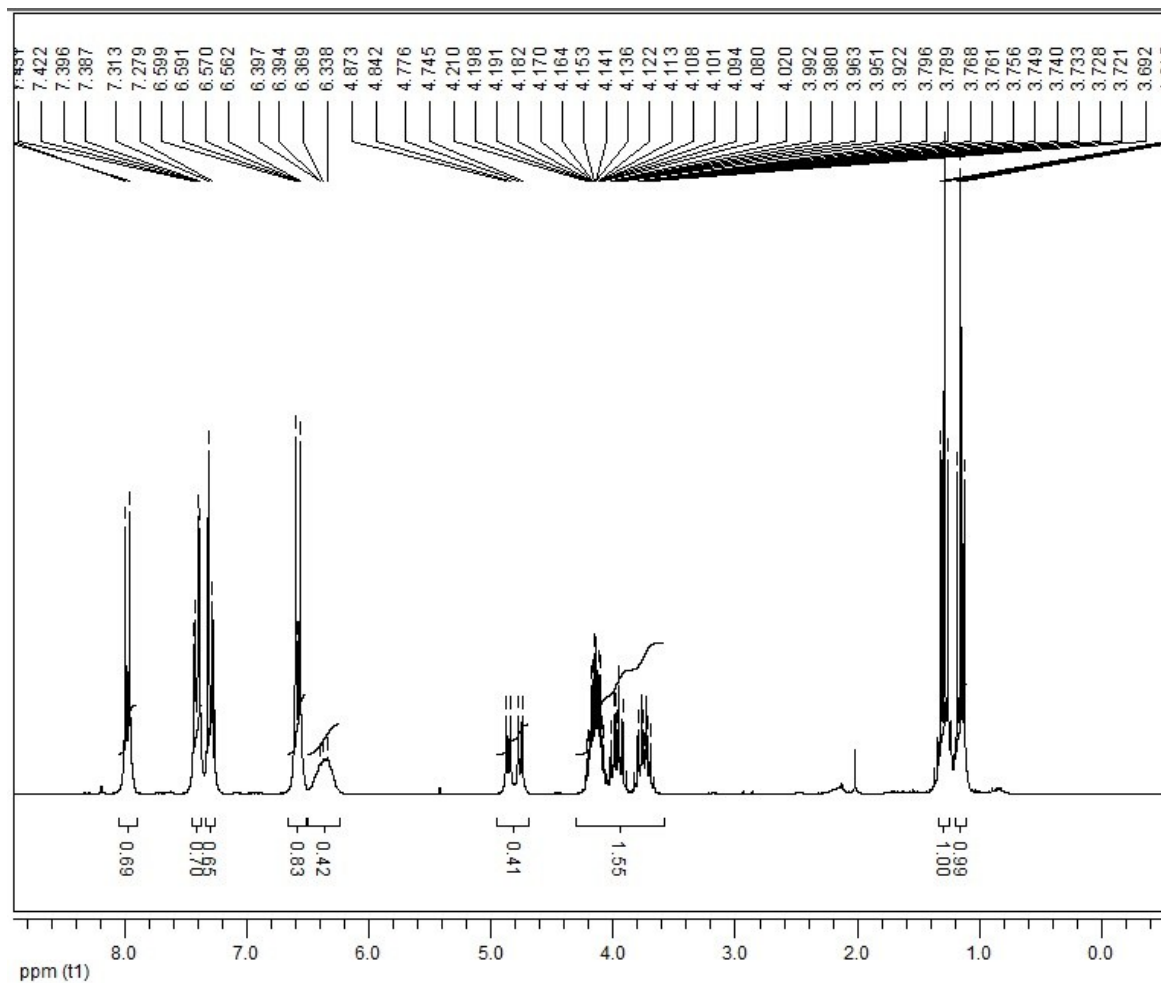

<sup>1</sup>H NMR

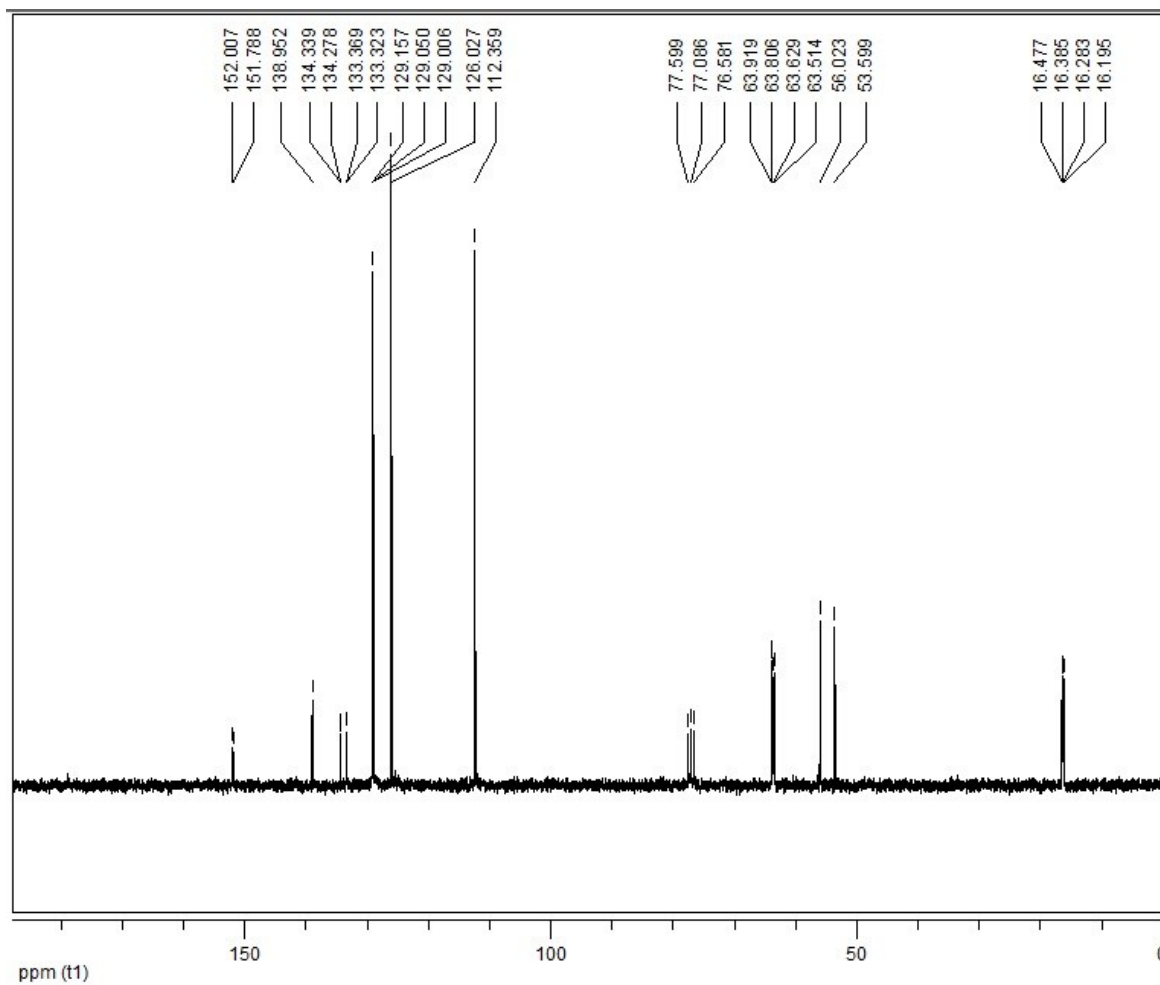

<sup>13</sup>C NMR

(2n):

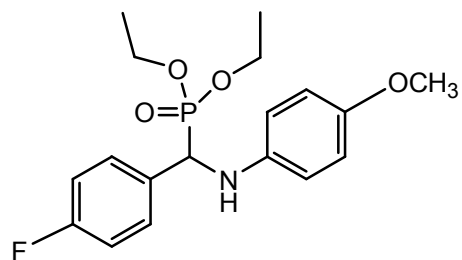

White solid (mp: 50-54 °C, Lit.45-48°C );  $^{12}\text{C}$ -NMR ( $\text{CDCl}_3$ , 250 MHz)  $\delta$  (ppm): 7.37-7.35 (m, 2H), 6.98-6.90 (m, 2H), 6.62 (d, 2H,  $J=9\text{Hz}$ ), 6.45 (d, 2H,  $J=9\text{Hz}$ ), 4.64-4.59 (m, 1H), 4.55-4.50 (m, 1H), 4.10-3.64 (m, 4H), 3.61-3.56 (m, 3H), 1.21 (mt, 3H), 1.07 (mt, 3H);  $^{13}\text{C}$ -NMR ( $\text{CDCl}_3$ , 62.9 MHz)  $\delta$  (ppm): 152.7, 150.4, 140.0 (d,  $^3J(\text{C-P})=15.8\text{Hz}$ ), 131.7 (d,  $^2J(\text{C-P})=5.3\text{Hz}$ ), 129.5 (dd,  $^3J(\text{C-F})=8.0\text{Hz}$ ,  $^3J(\text{C-P})=5.5\text{Hz}$ ), 115.5 (d,  $^2J(\text{C-F})=22.8\text{Hz}$ ), 115.2, 114.7, 63.1-63.4 (m, 2C,  $-\text{CH}_2-$ ), 56.2(d,  $-\text{CH}-$ ,  $^1J(\text{C-P})=151.4\text{Hz}$ ), 55.6 ( $-\text{OCH}_3$ ), 16.1-16.4 (m, 2C,  $-\text{CH}_3$ ); IR (KBr):  $\nu$  [ $\text{cm}^{-1}$ ] 3320, 2930, 2880, 2800, 1640, 1560, 1250, 1020, 996.0.

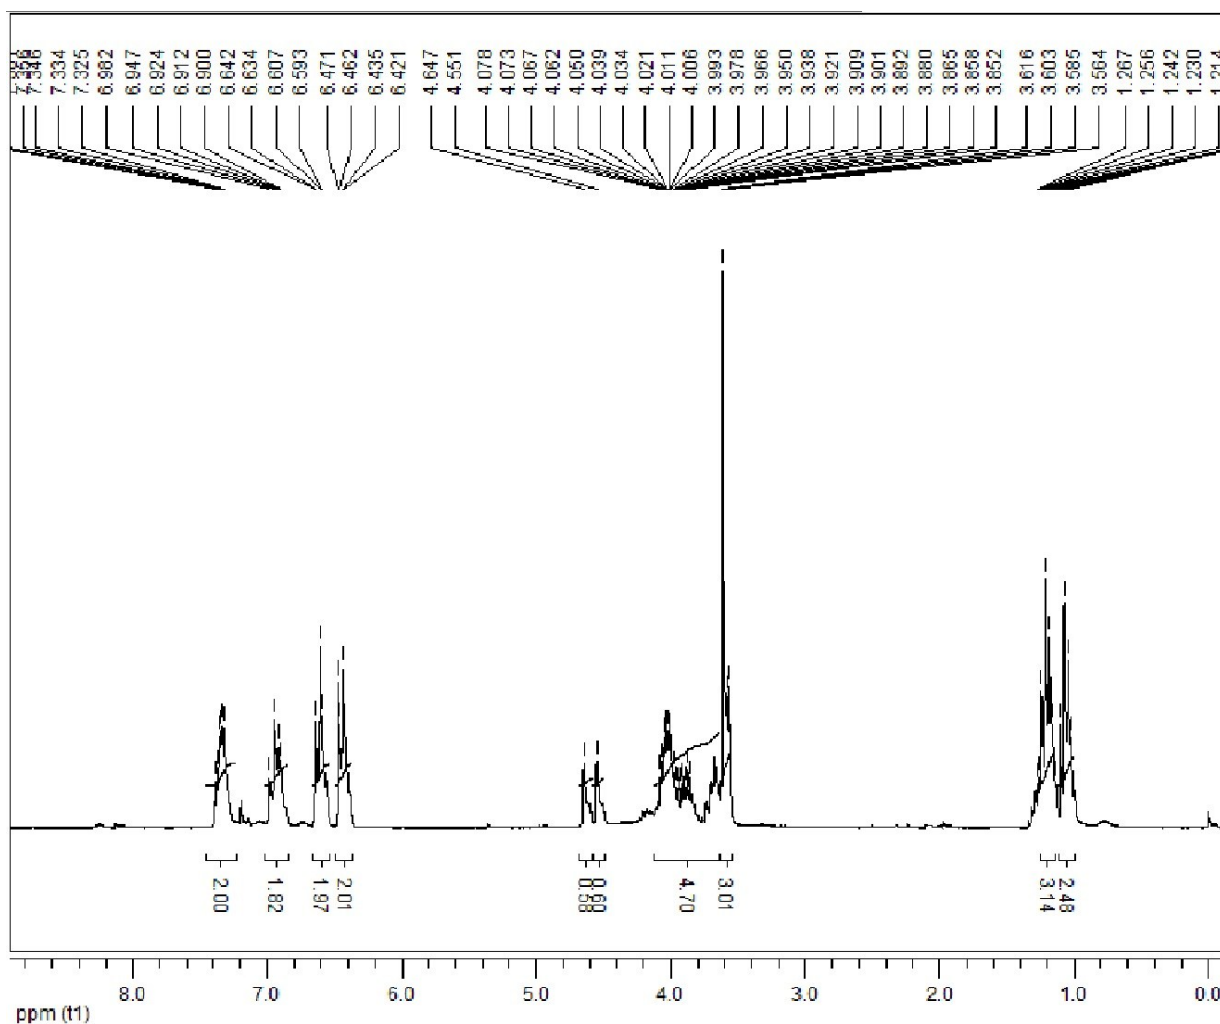

$^1\text{H}$  NMR

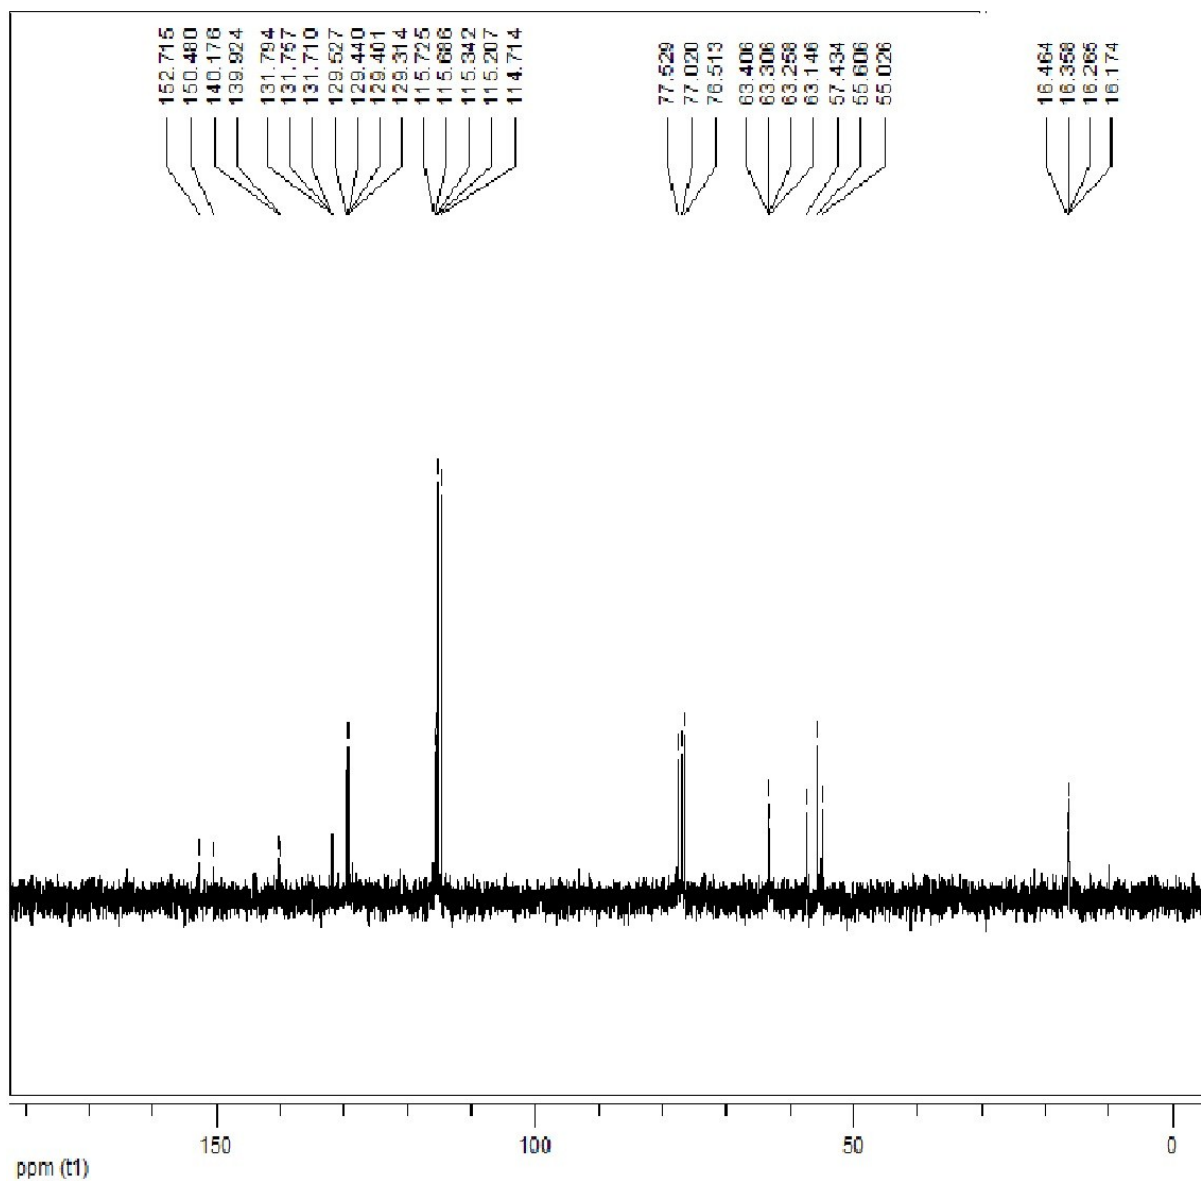

<sup>13</sup>C NMR

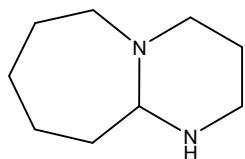

$^1\text{H-NMR}$  ( $\text{CDCl}_3$ , 250 MHz)  $\delta$  (ppm): 4.9 (s, 1H), 3.18 (t, 1H,  $J=4.0\text{Hz}$ ), 2.80 (broad s, 4H), 2.65 (broad s, 2H), 1.27 (broad s, 2H), 1.00 (broad s, 8H);  $^{13}\text{C-NMR}$  ( $\text{CDCl}_3$ , 62.9 MHz)  $\delta$  (ppm): 77.2 (-CH-), 53.6, 48.0, 37.4, 31.5, 28.4, 26.2, 23.5, 19.0.

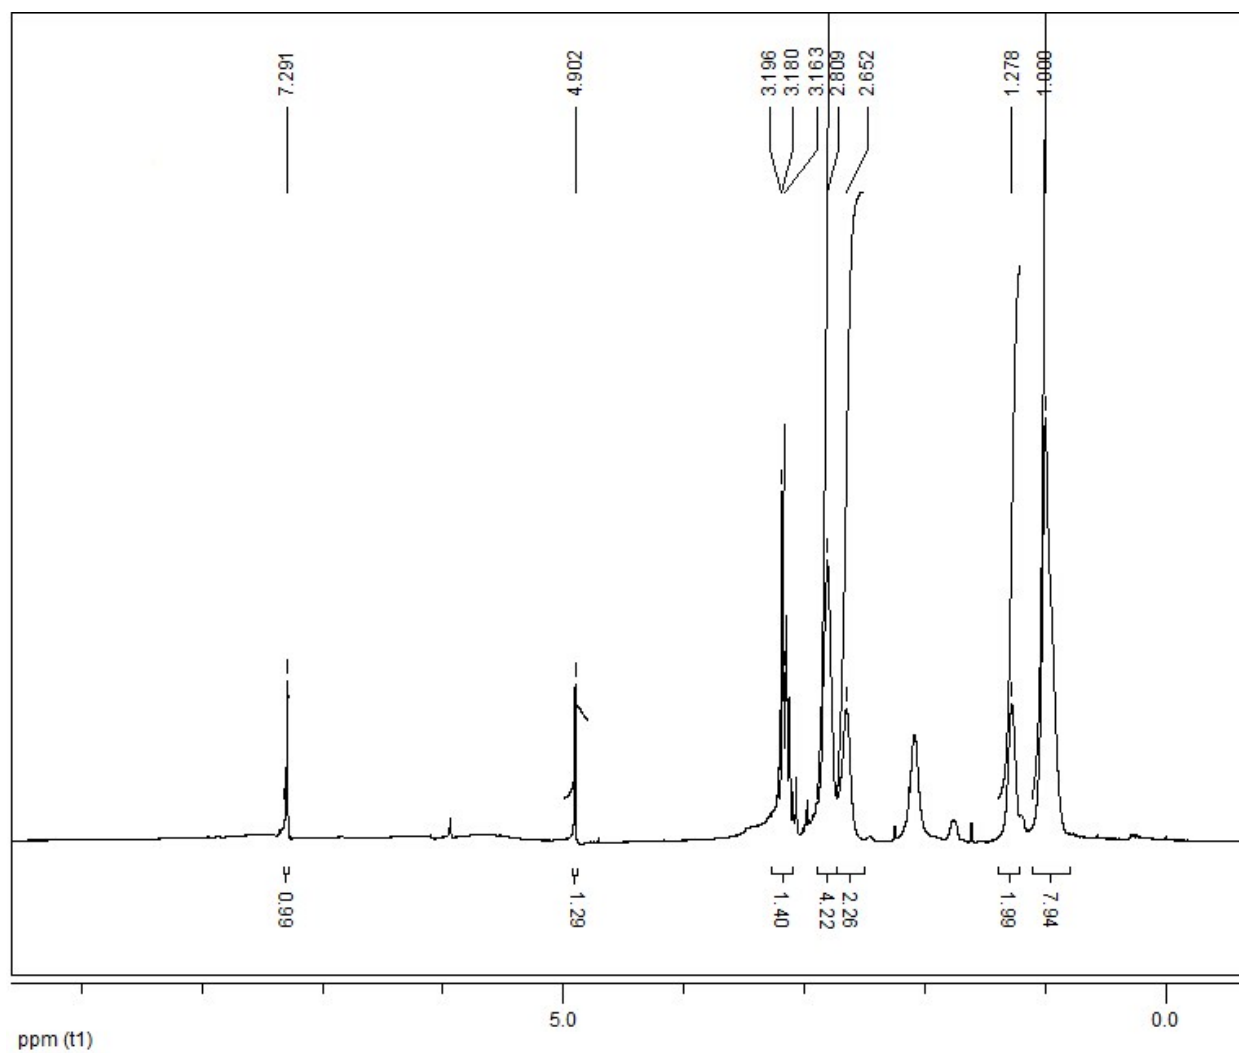

**$^1\text{H NMR}$  of the reaction mixture after removing the main product (Reduced form of DBU)**



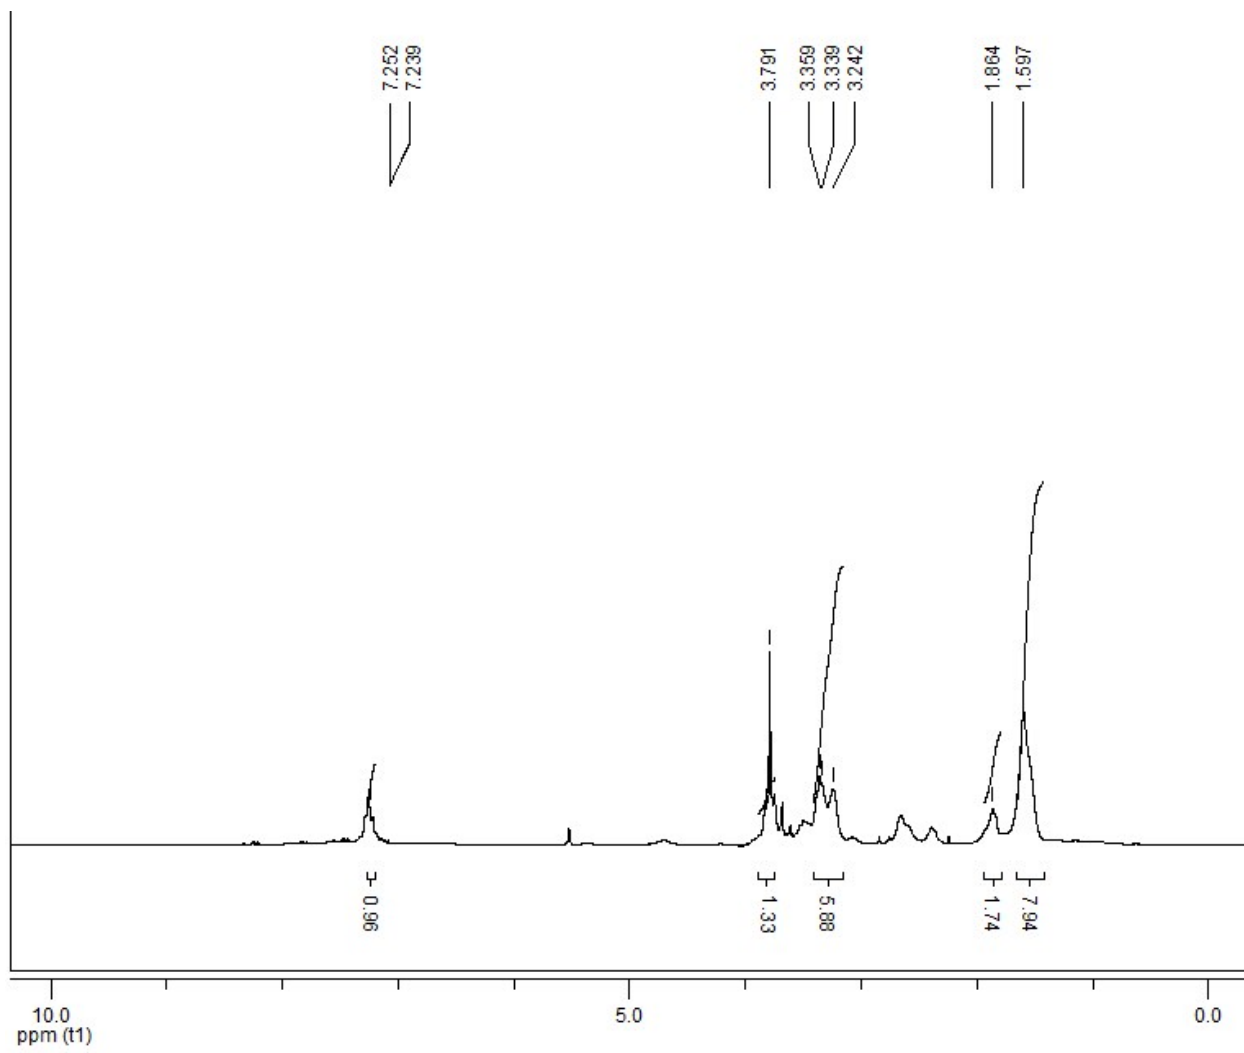

$^1\text{H}$  NMR of reduced form of DBU &  $\text{D}_2\text{O}$

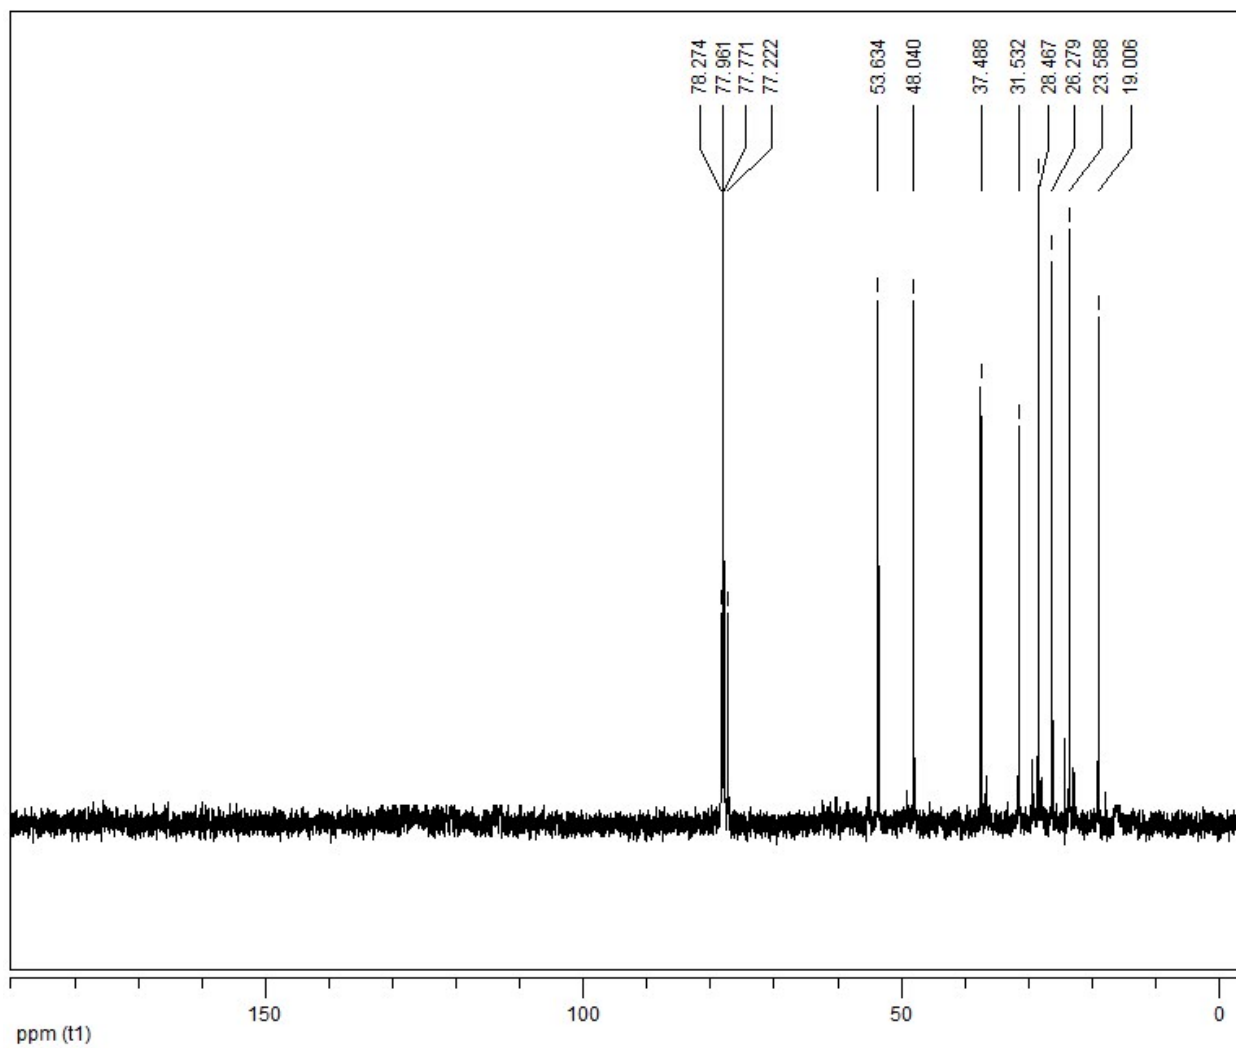

$^{13}\text{C}$  NMR

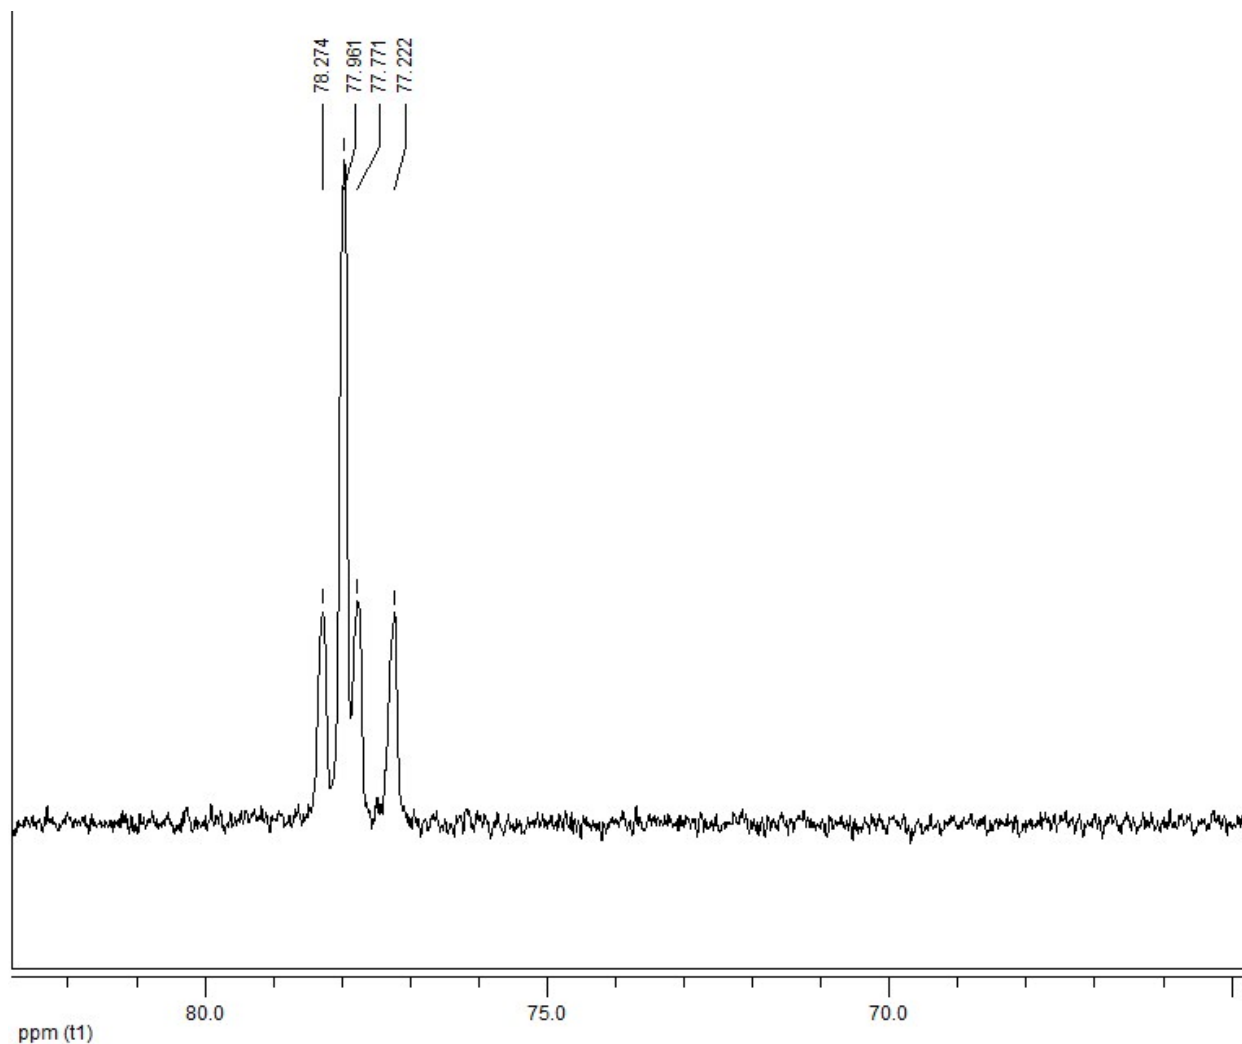

Expanded  $^{13}\text{C}$  NMR of  $\text{CDCl}_3$  and  $-\text{CH}-$

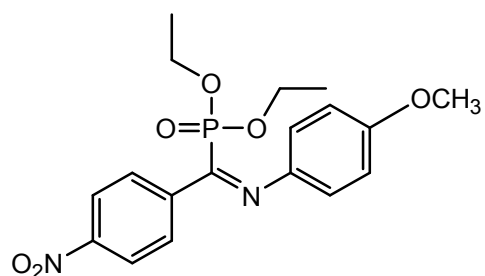

Yellow oil;  $^1\text{H}$ -NMR ( $\text{CDCl}_3$ , 250 MHz)  $\delta$  (ppm): 8.17 (d, 2H,  $J=16.7\text{Hz}$ ), 7.77 (d, 2H,  $J=16.7\text{Hz}$ ), 7.19-6.90 (m, 4H), 4.73-4.23 (m, 4H), 3.91 (s, 3H), 1.39-1.14 (m, 6H);  $^{13}\text{C}$ -NMR ( $\text{CDCl}_3$ , 62.9 MHz)  $\delta$  (ppm): 198.7, 160.5, 151.5, 145.0, 137.5 (d,  $^2J(\text{C-P})=4.9\text{Hz}$ ), 129.3 (d,  $^2J(\text{C-P})=4.5\text{Hz}$ ), 122.7, 122.6, 115.5, 60.2 (d,  $-\text{CH}_2-$ ,  $^2J(\text{C-P})=5.7\text{Hz}$ ), 53.0 (1C,  $-\text{OCH}_3$ ), 16.6 (d,  $-\text{CH}_3$ ,  $^3J(\text{C-P})=4.7\text{Hz}$ );  $^{31}\text{P}$ -NMR ( $\text{CDCl}_3$ , 162 MHz)  $\delta$  (ppm): 4.85.

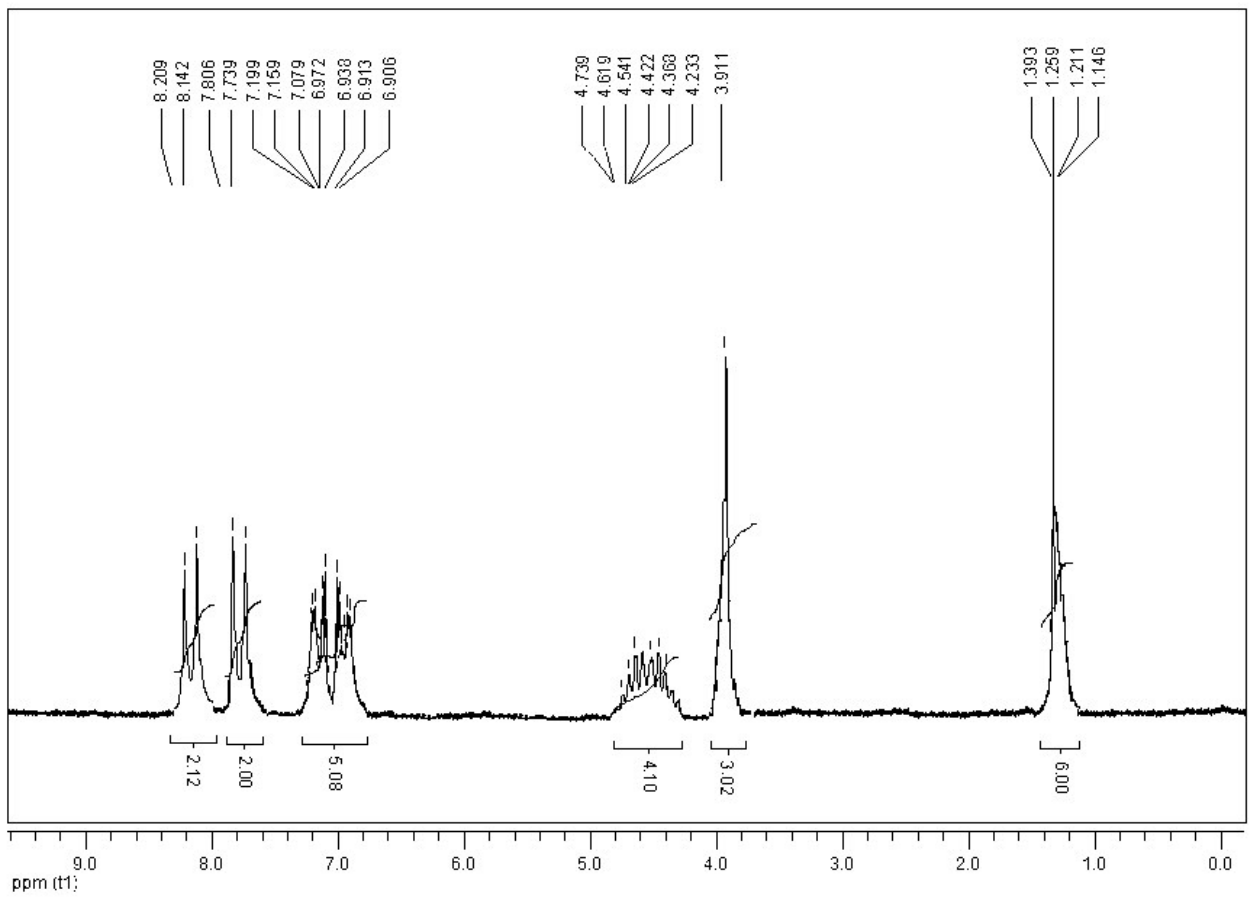

$^1\text{H}$  NMR

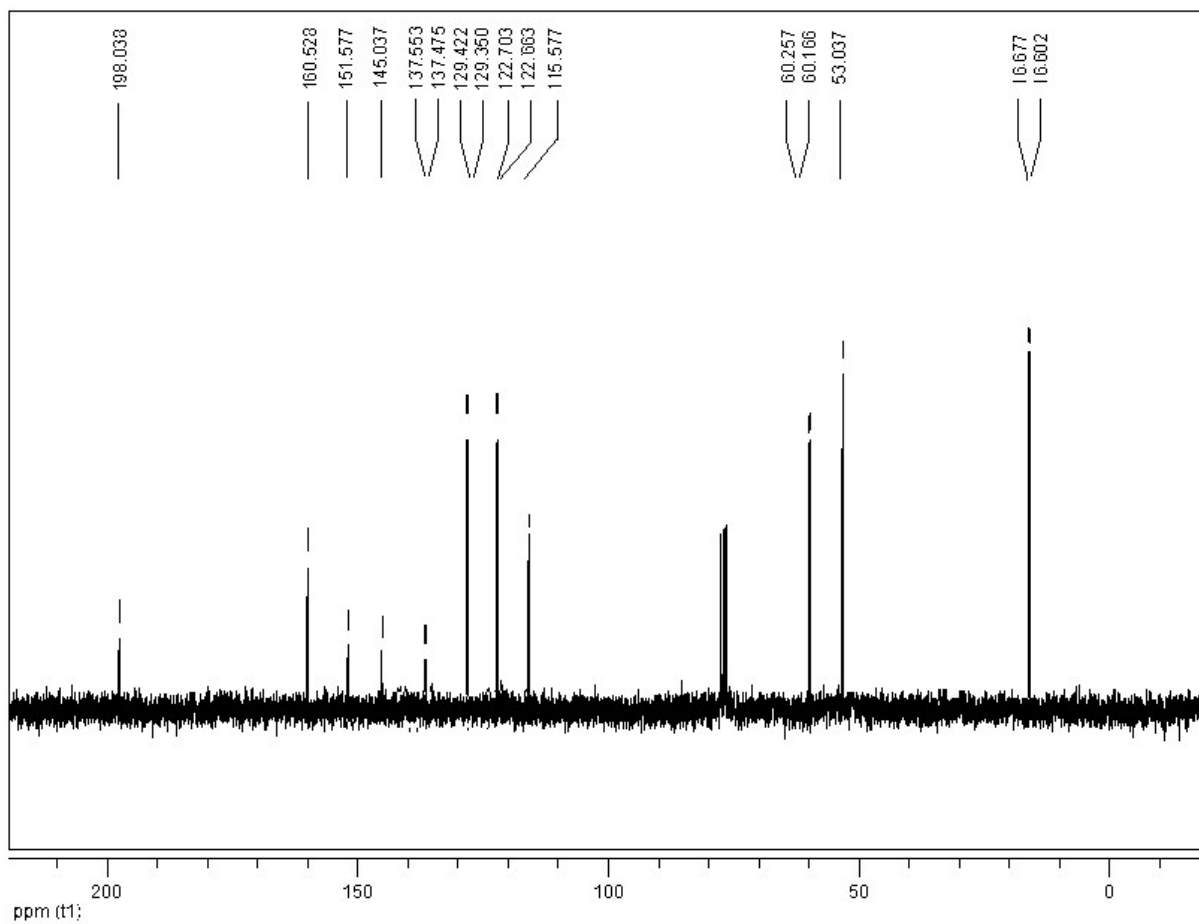

$^{13}\text{C}$  NMR

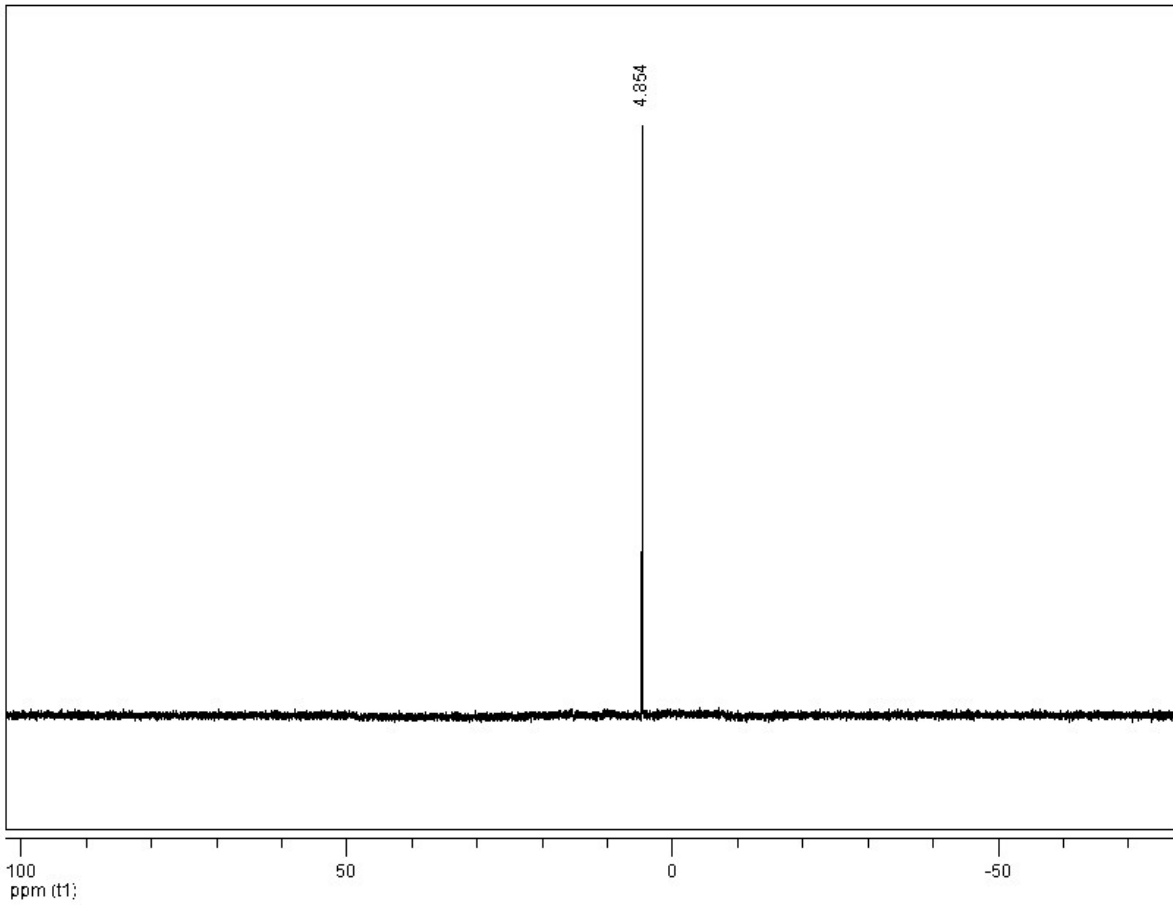

$^{31}\text{P}$  NMR
